# Supplementary material for: The value of supportive care: A systematic review of cost-effectiveness of non-pharmacological interventions for dementia
Source: PubMed Central journal article supplement (PMC10180718; doi:10.1371/journal.pone.0285305), 2023-05-12
Supplement: pone.0285305.s009.pdf [file pone.0285305.s009.pdf]

# PLOS ONE

## Less drugs and more care: A systematic review of cost-effectiveness of supportive care interventions for dementia --Manuscript Draft--

|                                |                                                                                                                                                                                                                                                                                                                                                                                                                                                                                                                                                                                                                                                                                                                                                                                                                                                                                                                                                                                                                                                                                                                                                                                                                                                                                                                                                                                                                                                                                                                                                                                                                                                                                                                                                                                                                                                                                                                                                                                                                                                                                                                                                                                                                                                                                                                                                                                                                            |
|--------------------------------|----------------------------------------------------------------------------------------------------------------------------------------------------------------------------------------------------------------------------------------------------------------------------------------------------------------------------------------------------------------------------------------------------------------------------------------------------------------------------------------------------------------------------------------------------------------------------------------------------------------------------------------------------------------------------------------------------------------------------------------------------------------------------------------------------------------------------------------------------------------------------------------------------------------------------------------------------------------------------------------------------------------------------------------------------------------------------------------------------------------------------------------------------------------------------------------------------------------------------------------------------------------------------------------------------------------------------------------------------------------------------------------------------------------------------------------------------------------------------------------------------------------------------------------------------------------------------------------------------------------------------------------------------------------------------------------------------------------------------------------------------------------------------------------------------------------------------------------------------------------------------------------------------------------------------------------------------------------------------------------------------------------------------------------------------------------------------------------------------------------------------------------------------------------------------------------------------------------------------------------------------------------------------------------------------------------------------------------------------------------------------------------------------------------------------|
| <b>Manuscript Number:</b>      | PONE-D-21-04004                                                                                                                                                                                                                                                                                                                                                                                                                                                                                                                                                                                                                                                                                                                                                                                                                                                                                                                                                                                                                                                                                                                                                                                                                                                                                                                                                                                                                                                                                                                                                                                                                                                                                                                                                                                                                                                                                                                                                                                                                                                                                                                                                                                                                                                                                                                                                                                                            |
| <b>Article Type:</b>           | Research Article                                                                                                                                                                                                                                                                                                                                                                                                                                                                                                                                                                                                                                                                                                                                                                                                                                                                                                                                                                                                                                                                                                                                                                                                                                                                                                                                                                                                                                                                                                                                                                                                                                                                                                                                                                                                                                                                                                                                                                                                                                                                                                                                                                                                                                                                                                                                                                                                           |
| <b>Full Title:</b>             | Less drugs and more care: A systematic review of cost-effectiveness of supportive care interventions for dementia                                                                                                                                                                                                                                                                                                                                                                                                                                                                                                                                                                                                                                                                                                                                                                                                                                                                                                                                                                                                                                                                                                                                                                                                                                                                                                                                                                                                                                                                                                                                                                                                                                                                                                                                                                                                                                                                                                                                                                                                                                                                                                                                                                                                                                                                                                          |
| <b>Short Title:</b>            | Cost-effectiveness of supportive care interventions for dementia                                                                                                                                                                                                                                                                                                                                                                                                                                                                                                                                                                                                                                                                                                                                                                                                                                                                                                                                                                                                                                                                                                                                                                                                                                                                                                                                                                                                                                                                                                                                                                                                                                                                                                                                                                                                                                                                                                                                                                                                                                                                                                                                                                                                                                                                                                                                                           |
| <b>Corresponding Author:</b>   | Vincenzo Rebba<br>University of Padova: Universita degli Studi di Padova<br>Padova, Italy ITALY                                                                                                                                                                                                                                                                                                                                                                                                                                                                                                                                                                                                                                                                                                                                                                                                                                                                                                                                                                                                                                                                                                                                                                                                                                                                                                                                                                                                                                                                                                                                                                                                                                                                                                                                                                                                                                                                                                                                                                                                                                                                                                                                                                                                                                                                                                                            |
| <b>Keywords:</b>               | dementia; non-pharmacological interventions; supportive care; cost-effectiveness                                                                                                                                                                                                                                                                                                                                                                                                                                                                                                                                                                                                                                                                                                                                                                                                                                                                                                                                                                                                                                                                                                                                                                                                                                                                                                                                                                                                                                                                                                                                                                                                                                                                                                                                                                                                                                                                                                                                                                                                                                                                                                                                                                                                                                                                                                                                           |
| <b>Abstract:</b>               | <p><b>Background:</b> Almost 44 million people are currently living with dementia worldwide. This number is set to increase threefold by 2050, posing a serious threat to the sustainability of healthcare systems. Overuse of antipsychotic drugs for the management of the symptoms of dementia carries negative consequences for patients while also increasing the health expenditures for the society. Supportive care interventions could be considered a safer and potentially cost-saving option. In this paper we provide a systematic review of the existing evidence regarding the cost-effectiveness and cost-utility of SCIs that are targeted towards persons living with dementia and their caregivers.</p> <p><b>Methods:</b> A systematic literature review was performed between February 2019 and March 2020 through searches of major healthcare electronic databases, including the Cochrane Library and PubMed (MEDLINE). The search strategy was based on PRISMA recommendations. We distinguished between five categories of supportive care strategies: cognitive therapies, physical activity, indirect strategies (organisational and environmental changes), interventions primarily targeted towards caregivers, and multicomponent interventions.</p> <p><b>Results:</b> Of the 3,221 articles retrieved, 33 met the inclusion criteria. These studies analysed 29 supportive care programmes located at different stages of the care pathway for dementia. Ten studies provided evidence of high cost-effectiveness for seven interventions: a multicomponent intervention targeted towards nursing home residents; two cognitive stimulation and occupational programmes for community-dwelling persons with dementia; two indirect interventions; two interventions aimed at caregivers of community-dwelling persons with dementia.</p> <p><b>Conclusion:</b> We find that the most promising supportive care strategies in terms of cost-effectiveness are multicomponent interventions targeted towards nursing home residents, some forms of tailored occupational therapy and home care support services, together with some forms of psychosocial intervention for informal caregivers of community-dwelling persons with dementia. Our results suggest that the adoption of effective supportive care interventions may increase the economic sustainability of dementia care.</p> |
| <b>Order of Authors:</b>       | <p>Angelica Guzzon</p> <p>Vincenzo Rebba</p> <p>Omar Paccagnella</p> <p>Michela Rigon</p> <p>Giovanni Boniolo</p>                                                                                                                                                                                                                                                                                                                                                                                                                                                                                                                                                                                                                                                                                                                                                                                                                                                                                                                                                                                                                                                                                                                                                                                                                                                                                                                                                                                                                                                                                                                                                                                                                                                                                                                                                                                                                                                                                                                                                                                                                                                                                                                                                                                                                                                                                                          |
| <b>Additional Information:</b> |                                                                                                                                                                                                                                                                                                                                                                                                                                                                                                                                                                                                                                                                                                                                                                                                                                                                                                                                                                                                                                                                                                                                                                                                                                                                                                                                                                                                                                                                                                                                                                                                                                                                                                                                                                                                                                                                                                                                                                                                                                                                                                                                                                                                                                                                                                                                                                                                                            |
| <b>Question</b>                | <b>Response</b>                                                                                                                                                                                                                                                                                                                                                                                                                                                                                                                                                                                                                                                                                                                                                                                                                                                                                                                                                                                                                                                                                                                                                                                                                                                                                                                                                                                                                                                                                                                                                                                                                                                                                                                                                                                                                                                                                                                                                                                                                                                                                                                                                                                                                                                                                                                                                                                                            |
| <b>Financial Disclosure</b>    | Funding from the University of Padua and Fondazione OIC is gratefully acknowledged.                                                                                                                                                                                                                                                                                                                                                                                                                                                                                                                                                                                                                                                                                                                                                                                                                                                                                                                                                                                                                                                                                                                                                                                                                                                                                                                                                                                                                                                                                                                                                                                                                                                                                                                                                                                                                                                                                                                                                                                                                                                                                                                                                                                                                                                                                                                                        |

Enter a financial disclosure statement that describes the sources of funding for the work included in this submission. Review the [submission guidelines](#) for detailed requirements. View published research articles from [PLOS ONE](#) for specific examples.

This statement is required for submission and **will appear in the published article** if the submission is accepted. Please make sure it is accurate.

#### Unfunded studies

Enter: *The author(s) received no specific funding for this work.*

#### Funded studies

Enter a statement with the following details:

- Initials of the authors who received each award
- Grant numbers awarded to each author
- The full name of each funder
- URL of each funder website
- Did the sponsors or funders play any role in the study design, data collection and analysis, decision to publish, or preparation of the manuscript?
- **NO** - Include this sentence at the end of your statement: *The funders had no role in study design, data collection and analysis, decision to publish, or preparation of the manuscript.*
- **YES** - Specify the role(s) played.

\* typeset

#### Competing Interests

Use the instructions below to enter a competing interest statement for this submission. On behalf of all authors, disclose any [competing interests](#) that could be perceived to bias this work—acknowledging all financial support and any other relevant financial or non-financial competing interests.

This statement is **required** for submission and **will appear in the published article** if the submission is accepted. Please make

The authors have declared that no competing interests exist.

sure it is accurate and that any funding sources listed in your Funding Information later in the submission form are also declared in your Financial Disclosure statement.

View published research articles from [PLOS ONE](#) for specific examples.

**NO authors have competing interests**

Enter: *The authors have declared that no competing interests exist.*

**Authors with competing interests**

Enter competing interest details beginning with this statement:

*I have read the journal's policy and the authors of this manuscript have the following competing interests: [insert competing interests here]*

\* typeset

**Ethics Statement**

Enter an ethics statement for this submission. This statement is required if the study involved:

- Human participants
- Human specimens or tissue
- Vertebrate animals or cephalopods
- Vertebrate embryos or tissues
- Field research

Write "N/A" if the submission does not require an ethics statement.

General guidance is provided below. Consult the [submission guidelines](#) for detailed instructions. **Make sure that all information entered here is included in the Methods section of the manuscript.**

N/A

**Format for specific study types**

**Human Subject Research (involving human participants and/or tissue)**

- Give the name of the institutional review board or ethics committee that approved the study
- Include the approval number and/or a statement indicating approval of this research
- Indicate the form of consent obtained (written/oral) or the reason that consent was not obtained (e.g. the data were analyzed anonymously)

**Animal Research (involving vertebrate animals, embryos or tissues)**

- Provide the name of the Institutional Animal Care and Use Committee (IACUC) or other relevant ethics board that reviewed the study protocol, and indicate whether they approved this research or granted a formal waiver of ethical approval
- Include an approval number if one was obtained
- If the study involved *non-human primates*, add *additional details* about animal welfare and steps taken to ameliorate suffering
- If anesthesia, euthanasia, or any kind of animal sacrifice is part of the study, include briefly which substances and/or methods were applied

**Field Research**

Include the following details if this study involves the collection of plant, animal, or other materials from a natural setting:

- Field permit number
- Name of the institution or relevant body that granted permission

**Data Availability**

Authors are required to make all data underlying the findings described fully available, without restriction, and from the time of publication. PLOS allows rare exceptions to address legal and ethical concerns. See the [PLOS Data Policy](#) and [FAQ](#) for detailed information.

Yes - all data are fully available without restriction

A Data Availability Statement describing where the data can be found is required at submission. Your answers to this question constitute the Data Availability Statement and **will be published in the article**, if accepted.

**Important:** Stating 'data available on request from the author' is not sufficient. If your data are only available upon request, select 'No' for the first question and explain your exceptional situation in the text box.

Do the authors confirm that all data underlying the findings described in their manuscript are fully available without restriction?

**Describe where the data may be found in full sentences. If you are copying our sample text, replace any instances of XXX with the appropriate details.**

- If the data are **held or will be held in a public repository**, include URLs, accession numbers or DOIs. If this information will only be available after acceptance, indicate this by ticking the box below. For example: *All XXX files are available from the XXX database (accession number(s) XXX, XXX).*
- If the data are all contained **within the manuscript and/or Supporting Information files**, enter the following: *All relevant data are within the manuscript and its Supporting Information files.*
- If neither of these applies but you are able to provide **details of access elsewhere**, with or without limitations, please do so. For example:

*Data cannot be shared publicly because of [XXX]. Data are available from the XXX Institutional Data Access / Ethics Committee (contact via XXX) for researchers who meet the criteria for access to confidential data.*

*The data underlying the results presented in the study are available from (include the name of the third party*

All relevant data are within the manuscript and its Supporting Information files.

|                                                                                                                                                                                                                                         |                                                                                                                                                                                  |
|-----------------------------------------------------------------------------------------------------------------------------------------------------------------------------------------------------------------------------------------|----------------------------------------------------------------------------------------------------------------------------------------------------------------------------------|
| <p><i>and contact information or URL).</i></p> <ul style="list-style-type: none"><li>• This text is appropriate if the data are owned by a third party and authors do not have permission to share the data.</li></ul> <p>* typeset</p> |                                                                                                                                                                                  |
| Additional data availability information:                                                                                                                                                                                               | Tick here if the URLs/accession numbers/DOIs will be available only after acceptance of the manuscript for publication so that we can ensure their inclusion before publication. |

# 1 **Less drugs and more care: A systematic review of cost-effectiveness of supportive** 2 **care interventions for dementia**

3  
4 **Short title:** *Cost-effectiveness of supportive care interventions for dementia*

5  
6 Angelica Guzzon<sup>1,2,3</sup>, Vincenzo Rebba<sup>1,2,4\*</sup>, Omar Paccagnella<sup>1,5</sup>, Michela Rigon<sup>1</sup>, Giovanni Boniolo<sup>1,6</sup>

7  
8 <sup>1</sup> Civitas Vitae Research Centre at Fondazione OIC, Padova, Italy

9 <sup>2</sup> CRIEP (Interuniversity Research Centre on Public Economics), Italy

10 <sup>3</sup> Department of Economics, Ca' Foscari University of Venice, Italy

11 <sup>4</sup> Department of Economics and Management “Marco Fanno”, University of Padova, Italy

12 <sup>5</sup> Department of Statistical Sciences, University of Padova, Italy

13 <sup>6</sup> Department of Neuroscience and Rehabilitation, University of Ferrara, Italy

14  
15 \* Corresponding author: [vincenzo.rebba@unipd.it](mailto:vincenzo.rebba@unipd.it) ORCID No. 0000-0003-4685-1890

16

## 17 **Authors contribution**

18 Conceptualization: Angelica Guzzon, Vincenzo Rebba, Giovanni Boniolo

19 Data curation: Angelica Guzzon, Vincenzo Rebba

20 Formal analysis: Angelica Guzzon

21 Investigation: Angelica Guzzon, Vincenzo Rebba

22 Methodology: Angelica Guzzon, Vincenzo Rebba, Omar Paccagnella, Michela Rigon, Giovanni Boniolo

23 Project Administration: Vincenzo Rebba

24 Resources: Giovanni Boniolo, Vincenzo Rebba

25 Supervision: Giovanni Boniolo, Vincenzo Rebba

26 Validation: Vincenzo Rebba, Omar Paccagnella, Michela Rigon, Giovanni Boniolo

27 Visualization: Angelica Guzzon, Vincenzo Rebba

28 Writing – original draft: Angelica Guzzon, Vincenzo Rebba, Omar Paccagnella

29 **Funding information:** Funding from the University of Padua and Fondazione OIC is gratefully  
30 acknowledged.

31 **Competing interests:** The authors have declared that no competing interests exist.

32 **Keywords:** dementia; non-pharmacological interventions; supportive care; cost-effectiveness

33

## 34 **Abstract**

35 **Background:** Almost 44 million people are currently living with dementia worldwide. This number is set to  
36 increase threefold by 2050, posing a serious threat to the sustainability of healthcare systems. Overuse of  
37 antipsychotic drugs for the management of the symptoms of dementia carries negative consequences for  
38 patients while also increasing the health expenditures for the society. Supportive care interventions could be  
39 considered a safer and potentially cost-saving option. In this paper we provide a systematic review of the  
40 existing evidence regarding the cost-effectiveness and cost-utility of SCIs that are targeted towards persons  
41 living with dementia and their caregivers.

42 **Methods:** A systematic literature review was performed between February 2019 and March 2020 through  
43 searches of major healthcare electronic databases, including the Cochrane Library and PubMed (MEDLINE).  
44 The search strategy was based on PRISMA recommendations. We distinguished between five categories of  
45 supportive care strategies: cognitive therapies, physical activity, indirect strategies (organisational and  
46 environmental changes), interventions primarily targeted towards caregivers, and multicomponent  
47 interventions.

48 **Results:** Of the 3,221 articles retrieved, 33 met the inclusion criteria. These studies analysed 29 supportive  
49 care programmes located at different stages of the care pathway for dementia. Ten studies provided evidence  
50 of high cost-effectiveness for seven interventions: a multicomponent intervention targeted towards nursing  
51 home residents; two cognitive stimulation and occupational programmes for community-dwelling persons with  
52 dementia; two indirect interventions; two interventions aimed at caregivers of community-dwelling persons  
53 with dementia.

54 **Conclusion:** We find that the most promising supportive care strategies in terms of cost-effectiveness are  
55 multicomponent interventions targeted towards nursing home residents, some forms of tailored occupational  
56 therapy and home care support services, together with some forms of psychosocial intervention for informal  
57 caregivers of community-dwelling persons with dementia. Our results suggest that the adoption of effective  
58 supportive care interventions may increase the economic sustainability of dementia care.

59

60



## 61 **Introduction**

62

63 Globally, about 43.8 million people were living with dementia in 2016 [1], and this number is projected to  
64 triple by 2050 [2]. The substantial increase in the prevalence of dementia, mostly driven by demographic  
65 trends, poses significant challenges to health and social care systems, especially in terms of economic  
66 sustainability. The scale of the problem becomes even greater when we take into account the indirect costs  
67 related to caregivers of persons with dementia (PwDs). Caregiving exacts a toll on caregivers' mental,  
68 emotional, physical, and financial health [3]; caregivers are twice as likely to suffer from depression [4], they  
69 use more medication and make more doctor visits [5-6], they save less money, and up to 9% of caregivers need  
70 to quit their jobs [7]. Considering the setbacks suffered in the research on viable pharmacological treatments  
71 to counteract the progression of different types of dementia [8-11], the serious risks associated with using  
72 antipsychotic medications to treat the behavioural and psychological symptoms of dementia (BPSD) [12-14],  
73 and the high costs of overprescribing anti-dementia drugs [15], the development of effective non-  
74 pharmacological interventions to integrate or substitute the use of medications is of particular importance to  
75 increase both the effectiveness and the economic sustainability of dementia care.

76 Given this background, resource allocation could be enhanced by shifting from a standard approach—focused  
77 on containing the impact of distressing symptoms on patients through medications—to a more comprehensive  
78 approach based on the notion of person-centred care. This new approach would also follow the patient  
79 throughout the whole course of the disease by providing personalised care as well as support to patients and  
80 families. Defined as *supportive care* [16] and representing “a full mixture of biomedical dementia care, with  
81 good quality, person-centred, psychosocial, and spiritual care,” this approach must be extended throughout the  
82 course of the illness to guarantee the overall wellbeing of PwDs and their caregivers [17]. The term supportive  
83 care (SC) refers to a wide array of non-pharmacological interventions that encompass a broad and growing  
84 range of services that are delivered either to the patient, the caregiver, or the patient-caregiver dyad [18-19].  
85 This approach has been previously experimented in cancer care for addressing the clinical and psychosocial  
86 needs of patients in order to provide optimal quality of life [20] and in end-of-life care for non-cancer patients  
87 [21]. One of its key aspects is the decreasing reliance on medications that do not offer a sufficient benefit  
88 relative to the risks they pose in favour of novel non-pharmaceutical interventions [22]. In the case of PwDs,

89 SC is characterised by the continuous assistance of patients and their relatives from diagnosis until death, a  
90 holistic and interdisciplinary approach to care, and a high level of flexibility in choosing the right care practices  
91 for each case [23]. It is therefore evident that this definition of SC should not be confused with the one  
92 sometimes adopted in the cost-effectiveness literature, where the term “best supportive care” is used to denote  
93 care as usual or non-intervention.

94 A key feature of SC in all its stages is the central role of both formal and informal caregivers: the former are  
95 meant to have in-depth knowledge and competencies to deal with dementia patients, while the latter need to  
96 be recognised as indispensable players in dementia care, and both need to form and maintain collaborative  
97 relationships to guarantee high-quality care to patients [24]. In particular, support to caregivers could be  
98 considered a win-win solution, as it is beneficial for carers, patients, and the sustainability of healthcare  
99 systems [25]. On the opposite side of the spectrum, the unregulated use—and sometimes abuse—of  
100 antipsychotic drugs is a no-win situation, as it is detrimental for the health of the patient, and it puts a strain  
101 on the budget of healthcare systems [22]. In particular, regarding the management of behavioural problems in  
102 Alzheimer’s disease, Gauthier and colleagues suggest that non-pharmacological interventions (including  
103 psychosocial/psychological counselling as well as interpersonal and environmental management) should be  
104 attempted first, followed by the least harmful medication for the shortest time possible [26].

105 Over the last few years, the evidence base on the effectiveness of non-pharmacological interventions (in terms  
106 of cognitive functioning and the reduction of behavioural symptoms of PwDs) has grown considerably [18-  
107 19]. Conversely, evidence on the value for money of non-pharmacological and SCIs for PwDs and their  
108 caregivers is still scant, despite the growing need for health care systems to base resource allocation decisions  
109 on cost-effective intervention strategies.

110 In this paper, we provide a systematic review of the main evidence on the cost-effectiveness of non-  
111 pharmacological and supportive practices for dementia, which may represent a safer, effective, and possibly  
112 more efficient alternative to traditional interventions based on pharmacological control of the behavioural  
113 symptoms associated with dementia, with the bonus that both patient and caregiver can benefit from some of  
114 these interventions at the same time.

115 Previous systematic reviews have highlighted the scarcity of economic evidence on non-pharmacological  
116 interventions for PwDs [27-28] and their caregivers [29]. These reviews were focused mainly on interventions

117 for community-dwelling persons with mild to moderate dementia [30] and home support interventions [31]. In  
118 contrast, we try to offer an all-encompassing review of cost-effectiveness studies on non-pharmacological and  
119 psychosocial interventions that target PwDs, their caregivers (either formal or informal), or the patient-  
120 caregiver dyad, and which are located at different stages of the care pathway for dementia and in different  
121 settings. Moreover, our systematic review is more complete since it provides evidence on the cost-effectiveness  
122 of indirect interventions such as organisational changes and innovations in the delivery of care and support.

123

## 124 **Alternative strategies in dementia care: the increasing role of** 125 **supportive care interventions**

126

127 The global costs of Alzheimer's disease, the most prevalent subtype of dementia, and other dementias were  
128 estimated at US\$818 billion in 2015 (equivalent to 1.09% of the global gross domestic product). These costs  
129 overcame the threshold of US\$1 trillion in 2018 and are projected to double by 2030 [1,32]. Direct medical  
130 care represents the smallest share of the worldwide costs (19.5%), while direct social care and informal care  
131 contribute to the total in similar proportions (40.1% and 40.4%, respectively). The costs are concentrated in  
132 countries with higher income levels, and there is an imbalance between the global distribution of prevalence:  
133 58% of people with dementia live in low- and middle-income countries, while 86% of costs occur in high-  
134 income countries. This is explained by the lower per-person costs in low- and middle-income countries due to  
135 lower wage costs and a high proportion of care provided by informal unpaid carers. However, current estimates  
136 often overlook important components of the socio-economic burden of dementia, such as the cost of health  
137 care for caregivers (due to anxiety or depression as a result of caring for someone with dementia), reduced  
138 quality of life (QoL) for PwDs and their carers, and the hidden costs that stack up before a diagnosis of  
139 dementia is even made [33].

140 Dementia-related costs are driven by the increase in life expectancy and the increased prevalence of cognitive  
141 impairment. Since demographic change is reducing the economically active part of the population, this poses  
142 a serious threat to the sustainability of social and health care systems [32-35]. There is consequently an urgent

143 need to find cost-effective bundles of medical and social care interventions that meet the needs of PwDs and  
144 their caregivers.

145 Regarding current drug therapies for dementia, cholinesterase inhibitors provide small but clinically important  
146 symptomatic benefits on cognition and function for persons with Alzheimer’s disease, Lewy body dementia,  
147 and Parkinson’s disease dementia. Moreover, in persons with severe Alzheimer’s disease and for people with  
148 moderate disease who cannot tolerate cholinesterase inhibitors, memantine has been shown to have a small  
149 effect on cognition. However, these medications do not significantly change the course of illness and may  
150 provoke side effects [2, 8, 9], while only a limited number of ongoing clinical trials are currently investigating  
151 the viability of drugs directed at diverse therapeutic targets (e.g., amyloid and tau pathological processes,  
152 inflammatory pathways, or glial cells) [9-11].

153 Available medications for treating PwDs have been shown to enhance the QoL for both the patient and  
154 caregiver when prescribed at the appropriate time during illness. In particular, cholinesterase inhibitors—not  
155 only in the mild to moderate stage but also when symptoms become more severe—are more cost-effective than  
156 placebo and probably also cost-saving (by delaying the onset of institutionalisation), while the evidence in  
157 support of the cost-effectiveness of combination therapy (a cholinesterase inhibitor plus memantine) is less  
158 clear [36-37]. Conversely, there are potentially serious risks associated with using antipsychotic medications  
159 to treat BPSD [12-14], and there is no economic case for their use; moreover, there is no clinical or economic  
160 case for using antidepressant drugs to treat people with Alzheimer’s disease who have comorbid depression  
161 [37].

162 A problem with antipsychotic medications is that these drugs do not offer a sufficient benefit relative to the  
163 risks they pose [25]; in fact, high prescription rates of antipsychotic drugs are putting dementia patients at risk  
164 of death and other adverse events. For example, a UK study shows that patients who received an antipsychotic  
165 treatment for 12 months were significantly more likely to have died by the 24-month and 36-month follow-up  
166 periods compared to patients who had received a placebo [38], while other studies have found a link between  
167 the use of antipsychotic drugs in dementia patients and an increase in motor symptoms and the risk of stroke  
168 and chest infections. Moreover, in many instances, antipsychotics are unnecessarily used to treat patients with  
169 only mild symptoms that could be addressed in other ways [22]. Despite this evidence in conjunction with the

170 warnings and best practice guidelines that have followed [12-14], the use of antipsychotic drugs is still  
171 widespread.

172 Non-pharmacological/SC interventions have emerged in the past few years as alternative and safer strategies  
173 to address BPSD and to enhance the QoL of both PwDs and their caregivers [16-17]. These interventions  
174 encompass a broad and growing range of services that are delivered either to the patient, the caregiver, or the  
175 patient-caregiver dyad; they stem from a variety of disciplines and their aim is to positively influence cognition,  
176 mood, agitation, activities of daily living (ADLs), and other symptoms of dementia [18-19].

177 A unified classification of SCIs for dementia does not exist yet, but several classifications can be found in the  
178 literature. For instance, Cammisuli et al. distinguish between holistic techniques, brief psychotherapy,  
179 cognitive methods, and alternative strategies [39]; in contrast, D'Onofrio et al. distinguish between cognitive  
180 and emotion-oriented interventions, sensory and multi-sensory stimulation interventions, and other  
181 interventions [40]. The World Alzheimer Report 2011 [41] and Nickel et al. [30] classified non-  
182 pharmacological interventions into four categories: physical exercise, interventions to support and enhance  
183 cognitive abilities, psychological and behavioural therapies, and occupational therapy.

184 In this paper, we distinguish between five categories of non-pharmacological/SC strategies: 1) cognitive  
185 therapies; 2) physical activity interventions; 3) indirect strategies; 4) interventions primarily targeted towards  
186 caregivers; 5) and multicomponent interventions.

187 We classify as cognitive therapies all those methods that stimulate a patient's cognition and may also control  
188 BPSD in several ways, including the following:

- 189 • Cognitive stimulation therapy (CST) is an evidence-based rehabilitation technique to enhance residual  
190 cognitive abilities and functional skills and preserve implicit memory [42]; patients are involved in  
191 activities such as word association games, quizzes, number games, physical games, and creative  
192 activities [43];
- 193 • Occupational therapy has the primary focus of preserving patients' independence by improving their  
194 ability to perform ADLs and adapt to their living environment; it can also be administered in a home  
195 setting by trained caregivers [44];

- 196       • Reality orientation therapy (ROT), one of the most popular psychosocial interventions to manage  
197 dementia, has the main goal of spatially and temporally reorienting patients, but it also helps the patient  
198 to maintain social interaction [45-46];
- 199       • Reminiscence therapy encourages patients to recall and talk about past experiences and events in their  
200 lives, either in individual or group sessions, and with the aid of props like photographs and videos  
201 [47];
- 202       • Learning therapy is a combined form of cognitive training and stimulation (adopted especially in Japan  
203 and the U.S.), where instructors help patients to perform simple calculations or reading tasks with  
204 face-to face verbal communication [48];
- 205       • Art or music therapy entails the therapeutic use of art or music to provide a dementia patient with  
206 meaningful stimulation and improve her/his participation and level of self-esteem [49]; one example  
207 is the global music approach to dementia (GMA-D), a patient-tailored music intervention [50];
- 208       • Intergenerational activities are those in which children and people with dementia can interact with  
209 each other to improve the patients' social interaction and sense of purpose [51];
- 210       • Doll and plushie therapy is usually used on patients with advanced dementia and involves the patient  
211 in behaviours such as holding, cuddling, feeding and dressing dolls or plushies [52];
- 212       • Pet therapy consists of the interaction of patients with animals, including activities such as petting,  
213 feeding, and playing with dogs and other animals [53].
- 214 Physical activity interventions include walking groups, aerobic exercise, and resistance training. These  
215 interventions can produce health benefits for patients, such as decreasing the number of falls and improving  
216 sleep and mood [54-56].
- 217 Indirect strategies include organisational and environmental changes, together with innovations in the delivery  
218 of care and support:
- 219       • Dementia care management programmes are defined as interventions delivered in the community  
220 aiming to coordinate the treatment and care for PwDs with respect to their needs and the  
221 recommendations of evidence-based guidelines [57-59];

- 222 • Dementia Care Mapping (DCM) is an observational tool that assists in the delivery of better formal  
223 care to PwDs, allowing for the adoption of a person-centred care approach to improve the quality of  
224 care of dementia patients [60];
- 225 • The Managing Agitation and Raising Quality of Life (MARQUE) intervention, a manual-based  
226 intervention targeted at the staff of care homes, is designed to train them in the implementation of  
227 procedures to reduce agitation in dementia patients [61];
- 228 • Memory clinics are facilities that provide guidance, prescriptions, rehabilitation, and various non-  
229 pharmacological interventions to dementia patients [62];
- 230 • Group living interventions allow patients with a similar level of cognitive impairment to cohabite in a  
231 controlled environment [63].

232 Interventions primarily aimed at caregivers include the following:

- 233 • Respite care refers to any kind of arrangement that provides short-term relief to primary caregivers by  
234 providing the patient with an alternative source of care and supervision; adult day centres and nurse  
235 visits are both forms of respite care [64-65];
- 236 • Programmes for caregivers include any intervention, usually of a psychosocial nature, that is primarily  
237 aimed at the primary caregivers; examples are support groups, family meetings, and coping strategies  
238 [66-70].

239 Lastly, we classify as multicomponent interventions the protocols that combine two or more different  
240 interventions among those described above. Examples of multicomponent interventions are the following:

- 241 • The WHELD (Wellbeing and Health for People with Dementia) intervention is implemented within a  
242 person-centred care framework; it includes physical exercise, approaches to reduce agitation, and  
243 psychosocial activities [71-72];
- 244 • Integrated approaches consist of personalised bundles of non-pharmacological interventions for the  
245 patient-caregiver dyad that are chosen after mapping their needs [73-74];
- 246 • Multicomponent support programmes are targeted at couples for whom one of the spouses suffers  
247 from dementia; they are support programmes that include group meetings for the caregivers, scheduled  
248 assessments by a geriatrician, and individualised services for the couple [75];

- 249 • Journeying through Dementia (JtD) is an intervention targeting the early stages of dementia that  
250 combines occupational therapy with self-management and peer support [76].

251

## 252 **Materials and methods**

253

### 254 **Search strategy and criteria for inclusion**

255

256 A systematic literature review was performed between February 2019 and March 2020 on the healthcare  
257 electronic databases MEDLINE (PubMed) and CDSR (Cochrane Database of Systematic Reviews). The  
258 search terms used to identify the articles to include in the review were as follows: (dementia OR alzheimer\*)  
259 AND ('cost-effectiveness'/exp OR 'cost-analysis'/exp OR 'cost-utility'/exp) AND ('non-pharmacological'/exp  
260 OR psychosocial\* OR 'drug-free'/exp). Additional details on the electronic search strategy can be found in the  
261 S1 File.

262 Study eligibility was based on the following criteria:

- 263 • Studies evaluating dementia interventions of any kind but the pharmacological one;
- 264 • Interventions aimed at either the patient or the caregiver (or the dyad patient-caregiver);
- 265 • The participants in the study had a diagnosis of dementia or were caregivers of a person with diagnosed  
266 dementia;
- 267 • Studies focusing on common and objective outcome measures for this area of research, to maximise  
268 comparability;
- 269 • Studies including an economic evaluation (a cost-effectiveness analysis and/or cost-utility analysis) or  
270 at least sufficient information on outcomes and costs to derive an incremental cost-effectiveness ratio  
271 (ICER) [77];
- 272 • Studies with an abstract in English.

273 The search strategy and the following review are both based on PRISMA recommendations [78]. The outcomes  
274 of the study selection process are described in the Results section.

275



## 276 **Data collection and analysis**

277

278 Data extraction was performed according to the guidelines of the Centre for Reviews and Dissemination for  
279 reviews of economic evaluations [79]; information was collected on the type of economic evaluation, study  
280 objective, study design, description of the intervention, comparators, measures of benefit and cost, and  
281 outcome and cost results.

282 The high heterogeneity in terms of interventions and outcome measures of the studies evaluated made it  
283 impossible to perform a meta-analysis, so we proceeded with a qualitative analysis.

284

## 285 **Quality appraisal of included studies**

286

287 The methodological quality of the studies included in the review was assessed using the Consensus on Health  
288 Economic Criteria (CHEC) checklist [80], which consists of 19 yes-or-no questions. To each study, we  
289 assigned a score from 0 to 19 based on the number of questions that the assessor answered with a “yes”. Studies  
290 were classified as being high-quality if the score was equal to or higher than 17, medium-quality studies were  
291 those with a score between 14 and 16, and low-quality studies were those which scored 13 or lower. The score  
292 also reflects the information contained in additional analyses for those that actively pointed to other articles  
293 for additional information on the study design and/or protocol. The principal reviewer (AG) assessed the  
294 quality of all the articles, and the other four members of the research team (VR, OP, MR, and GB) checked for  
295 accuracy within their subsets. Any disagreement was resolved through discussion or consultation. The quality  
296 appraisal was undertaken to aid in interpreting the findings and determining the strength of the conclusions  
297 drawn; no study was excluded based on the results of the quality assessment.

298

299

## 300 **Main outcomes of supportive care interventions**

301

302 As mentioned above, the outcome indicators considered in the studies included in the review were highly  
303 heterogeneous even though it is possible to broadly distinguish between patient and caregiver outcome  
304 measures.

305 The main patient outcomes considered in the analysed studies were the following:

- 306 • Quality of life – the cognitive and functional decline brought about by dementia has a huge impact on  
307 the patient’s QoL, and most studies include both generic health-related QoL (HRQoL) and dementia-  
308 related QoL as outcomes [81];
- 309 • Cognitive impairment – dementia impacts short- and long-term memory but also other cognitive  
310 functions such as language, abstract thinking, and judgement [82];
- 311 • Dementia severity – the gradual progression of the disease is measured with staging instruments that  
312 monitor the clinical and cognitive deterioration caused by dementia [83];
- 313 • Behavioural and psychological symptoms of dementia (BPSD) – these neuropsychiatric disturbances,  
314 such as apathy or hallucinations (or other non-cognitive symptoms), constitute a major component of  
315 dementia and have an impact on QoL [84];
- 316 • General health – this variable is gauged by looking at comorbidities, adverse events (i.e., untoward  
317 medical occurrences in a patient, including falls and fractures), nutritional status, etc. [85-86];
- 318 • Mental health – this variable can be measured by looking at an individual’s depression levels, anxiety  
319 levels, schizophrenic or psychotic episodes, etc. [87];
- 320 • Agitation – as one of the most commonly observed neuropsychiatric symptoms in patients suffering  
321 from dementia, this condition is described as restless behaviour or improper physical and/or verbal  
322 action that can be a source of trouble for others [88];
- 323 • ADLs and IADLs – the number of (instrumental) activities of daily living an individual is able to carry  
324 out in an accepted way is a measure of functional capacity, which is an important indicator of health  
325 in the elderly [89];
- 326 • Prescription drug use – the use of antipsychotic medications to treat the BPSD;

327 • Service utilisation (and related costs) – the extent to which dementia patients use medical and/or social  
 328 services and resources [90], including institutionalisation [91].

329 For each patient outcome, Table 1 reports the correlate measures considered in the selected studies.

330

331 **Table 1. Patient outcomes and their measures in the reviewed studies.**

| Outcome                                | Measures                                                                                                                                                                                                                                                                                                                                                                                                                                                                    |
|----------------------------------------|-----------------------------------------------------------------------------------------------------------------------------------------------------------------------------------------------------------------------------------------------------------------------------------------------------------------------------------------------------------------------------------------------------------------------------------------------------------------------------|
| Health Related Quality of life (HRQoL) | <ul style="list-style-type: none"> <li>• EuroQol (EQ-5D)</li> <li>• Short Form-12 Health Survey (SF-12)</li> <li>• Index of Well-Being (IWB)</li> <li>• Rosser index</li> </ul>                                                                                                                                                                                                                                                                                             |
| Dementia-Related Quality of life       | <ul style="list-style-type: none"> <li>• Dementia Quality of Life (DEMQOL)</li> <li>• Quality of Life in Alzheimer's Disease (QoL-AD)</li> </ul>                                                                                                                                                                                                                                                                                                                            |
| Cognitive impairment                   | <ul style="list-style-type: none"> <li>• Mini-Mental State Examination (MMSE)</li> <li>• Alzheimer's Disease Assessment Scale – Cognitive Subscale (ADAS-COG)</li> <li>• Verbal fluency test (VF)</li> <li>• Clock drawing test (CDT)</li> <li>• Frontal Assessment Battery (FAB)</li> <li>• Autobiographical Memory Interview (AMI)</li> </ul>                                                                                                                             |
| Dementia severity                      | <ul style="list-style-type: none"> <li>• Clinical Dementia Rating (CDR)</li> <li>• Functional Assessment Staging of Alzheimer's Disease (FAST)</li> </ul>                                                                                                                                                                                                                                                                                                                   |
| Behavioural and psychological symptoms | <ul style="list-style-type: none"> <li>• Neuropsychiatric Inventory (NPI)</li> <li>• Behavioural and Psychological Symptoms of Dementia (BPSD)</li> <li>• Revised Memory and Behavior Problems Checklist (RMBPC)</li> </ul>                                                                                                                                                                                                                                                 |
| General health                         | <ul style="list-style-type: none"> <li>• Short Form-12 Health Survey (SF-12)</li> <li>• General Health Questionnaire (GHQ)</li> <li>• Charlson Comorbidity Index (CCI)</li> <li>• Disability Assessment for Dementia (DAD)</li> <li>• Falls and fractures</li> <li>• Institutionalisation rates</li> <li>• Certification of Needed Long-Term Care (CNLTC)</li> <li>• COOP WONCA Functional Status Assessment Charts</li> <li>• Mini Nutritional Assessment (MNA)</li> </ul> |
| Mental health                          | <ul style="list-style-type: none"> <li>• Hospital Anxiety and Depression Scale (HADS)</li> <li>• Global Deterioration Scale (GDS)</li> <li>• Cornell Scale for Depression in Dementia (CSDD)</li> <li>• Rating of Anxiety In Dementia (RAID)</li> <li>• MOS 20-Item Short Form Survey Instrument – Mental Health (MOS-20MH)</li> </ul>                                                                                                                                      |
| Agitation                              | <ul style="list-style-type: none"> <li>• Cohen-Mansfield Agitation Inventory (CMAI)</li> </ul>                                                                                                                                                                                                                                                                                                                                                                              |
| Activities of daily living             | <ul style="list-style-type: none"> <li>• Alzheimer's Disease Cooperative Study ADL Scale (ADCS-ADL)</li> <li>• Barthel Index (BI)</li> <li>• Bristol Activities of Daily Living Scale (BADLS)</li> <li>• Groningen Activities Restriction Scale (GARS)</li> <li>• Lawton Brody scale (IADLs)</li> <li>• Assessment of Motor and Process Skills (AMPS)</li> </ul>                                                                                                            |

|                           |                                                                                                                                                                                                                           |
|---------------------------|---------------------------------------------------------------------------------------------------------------------------------------------------------------------------------------------------------------------------|
|                           | <ul style="list-style-type: none"> <li>• Interview for Deterioration in Daily Living Activities in Dementia (IDDD)</li> <li>• Katz scale (ADLs)</li> <li>• Multi-Dimensional Dementia Assessment Scale (MDDAS)</li> </ul> |
| Use of prescription drugs | <ul style="list-style-type: none"> <li>• Use of antipsychotics</li> </ul>                                                                                                                                                 |
| Service utilisation       | <ul style="list-style-type: none"> <li>• Client Service Receipt Inventory (CSRI)</li> <li>• Resource Utilization in Dementia (RUD)</li> <li>• Institutionalization rates</li> </ul>                                       |

332

333 The main caregiver outcomes considered in the reviewed studies were the following (see Table 2 for details  
334 on the different measures for each outcome):

- 335       • Quality of life – dementia severely impacts the QoL of caregivers because caring for someone who  
336           suffers from dementia is extremely burdensome and contributes to physical and psychiatric illnesses  
337           [92];
- 338       • Burnout and burden – caregiver burden is the perceived negative effect of caring for a family member  
339           [93], while caregiver burnout is more specifically a state of physical, emotional, and mental exhaustion  
340           [94];
- 341       • Sense of competence and mastery – competence is the extent to which a caregiver feels he or she can  
342           effectively do what is needed for a patient, whereas mastery is the extent to which a caregiver feels in  
343           control of the situation; both have been linked to positive outcomes for the caregiver [95-96];
- 344       • General health – caregivers are more likely to report poor health because they have less time to take  
345           care of themselves and face substantial stress (as indicated by the increased levels of cortisol) [97-98];
- 346       • Mental health – depression is very common among dementia caregivers, as are sleep disturbances,  
347           loneliness, and social isolation [99-100];
- 348       • Quality of interaction with the patient – low-quality interactions can undermine both the caregiver’s  
349           QoL and quality of care [101]; the quality of the relationship that occurs between the caregiver and  
350           the patient has been found to be predictive of outcomes like the patient’s institutionalisation and  
351           functional decline [102-103];
- 352       • Coping strategies – coping strategies employed by caregivers, such as avoidance or wishful thinking,  
353           are linked to physical and mental health outcomes [104];

- 354 • Time spent caregiving – caring for a PwD is not only a burdensome task, but it is also time consuming,  
 355 as it prevents informal caregivers from having a regular work-life balance [105];
- 356 • Service utilisation – the additional medical and social service use by caregivers themselves helps us  
 357 better understand the impact dementia has on societal costs [106];
- 358 • Absenteeism – formal and informal dementia caregivers are more likely to have higher absenteeism  
 359 rates [107].

360

361 **Table 2. Caregiver outcomes and their measures in the reviewed studies.**

| Outcome                                | Measures                                                                                                                                                                                                                                                             |
|----------------------------------------|----------------------------------------------------------------------------------------------------------------------------------------------------------------------------------------------------------------------------------------------------------------------|
| Health Related Quality of Life (HRQoL) | <ul style="list-style-type: none"> <li>• EuroQol (EQ-5D)</li> <li>• Short Form-12 Health Survey (SF-12)</li> <li>• World Health Organization Quality of Life Brief Version (WHOQoL-BREF)</li> <li>• RAND 36-Item Health Survey (RAND-36)</li> </ul>                  |
| Care Related Quality of Life           | <ul style="list-style-type: none"> <li>• Caregiver Quality of Life Instrument (CQLI)</li> </ul>                                                                                                                                                                      |
| Caregiver burden and burnout           | <ul style="list-style-type: none"> <li>• Maslach Burnout Inventory (MBI)</li> <li>• Zarit Burden Interview (ZBI)</li> </ul>                                                                                                                                          |
| Sense of competence and mastery        | <ul style="list-style-type: none"> <li>• Sense of Competence in Dementia Care (SCID)</li> <li>• Sense of Competence Questionnaire (SCQ)</li> <li>• Pearlin Mastery Scale (PMS)</li> </ul>                                                                            |
| General health                         | <ul style="list-style-type: none"> <li>• Short Form-12 Health Survey (SF-12)</li> </ul>                                                                                                                                                                              |
| Mental health                          | <ul style="list-style-type: none"> <li>• Relative Stress Scale (RSS)</li> <li>• Mini International Neuropsychiatric Interview (MINI)</li> <li>• Centre for Epidemiologic Studies Depression Scale (CES-D)</li> <li>• State Trait Anxiety Inventory (STAI)</li> </ul> |
| Quality of relationship                | <ul style="list-style-type: none"> <li>• Quality of Interactions Schedule (QUIS)</li> <li>• Quality of Carer and Patient Relationship scale (QCPR)</li> </ul>                                                                                                        |
| Coping strategies                      | <ul style="list-style-type: none"> <li>• COPE inventory</li> </ul>                                                                                                                                                                                                   |
| Time spent caregiving                  | <ul style="list-style-type: none"> <li>• Caregiving time spent doing things</li> <li>• Caregiving time spent being on duty</li> <li>• Resource Utilisation in Dementia questionnaire</li> </ul>                                                                      |
| Service utilisation                    | <ul style="list-style-type: none"> <li>• Health Services Utilization Questionnaire (HSUQ)</li> </ul>                                                                                                                                                                 |
| Absenteeism                            | <ul style="list-style-type: none"> <li>• Time away from work</li> </ul>                                                                                                                                                                                              |

362

363

364

## 365 **Results**

366

### 367 **Study selection**

368

369 The systematic search identified 3,218 publications. Duplicate citations were removed using Endnote X9,  
370 resulting in a total of 1,182 publications. After an initial screening of the titles and abstracts, 198 publications  
371 remained. After applying the eligibility criteria, 41 publications remained for full-text screening. A further 3  
372 articles were added after screening the references of the reviewed articles. A final sample of 33 studies  
373 remained for inclusion in the review, including a study in the Dutch language [73]. The search strategy, based  
374 on PRISMA recommendations [78], is shown in the flow chart in Fig 1.

375

376 **Fig 1. PRISMA flow chart of the study selection process.**

377

(FIGURE 1 SHOULD BE INSERTED HERE)

378

### 379 **Characteristics of the included studies**

380

381 We reviewed 33 studies that analysed 29 interventions: nine cognitive stimulation and occupational  
382 programmes primarily targeted at PwDs; two physical activity interventions; eight indirect interventions  
383 (organisational and environmental changes); six interventions primarily targeted towards carers; and four  
384 structured multicomponent interventions. Several SC programmes considered outside the formal category of  
385 “multicomponent interventions” may however include more elements when based on structured protocols  
386 combining different components; for example, the community-based occupational therapy programme  
387 directed at community-dwelling patient-caregiver dyads analysed by Graff et al. [108] included treatment at  
388 home of PwDs but also education and behaviour management for informal caregivers. The most common  
389 component across the reviewed interventions was behaviour management for carers, which was addressed in  
390 11 studies.

391 The interventions analysed in the studies were located at different stages of the care pathway for dementia: 12  
392 studies focused on patients with dementia in its mild to moderate stages and/or their caregivers  
393 [59,62,67,74,108-115]; 17 interventions addressed the moderate-to-severe stages [61, 63-66, 68, 71-73, 116-  
394 123]; and four studies focused on PwDs at different stages [58, 75, 124-125]. Six studies considered SCIs in  
395 nursing homes and assisted living settings [61, 71-72, 119-121], and two studies analysed both residential and  
396 community settings [111, 124], while the rest of the health economic analyses concerned community-based  
397 interventions. Most studies analysed SCIs directed at patient-caregiver dyads, while seven studies focused on  
398 specific programmes supporting informal caregivers of community-dwelling PwDs [64, 66-68, 117, 122, 123].  
399 Most studies (27 out of 33, and 23 out of 29 interventions) were conducted in European countries with  
400 comparable underlying health and social care systems (14 were based in the UK), while only six studies were  
401 developed in other OECD countries, including three in the United States, one in Japan, one in Australia, and  
402 one in Canada.

403 The studies were quite heterogeneous in terms of their design, the cost items included, and the choice of  
404 outcome measures. One study [63] used data from secondary sources in a Markov model to estimate the cost-  
405 utility of the intervention. Most studies (n = 26) used a randomised controlled trial (RCT) design, while five  
406 were non-randomised comparisons through prospective matched controlled trials [58, 63, 65, 119, 122].  
407 Eighteen of the analysed studies adopted a narrow perspective when measuring costs, looking only at health  
408 and social care, while the other 15 studies considered a broader societal perspective, including the opportunity  
409 costs of caregivers' inputs and the impacts of caring on their own health and wellbeing.

410 In all the analysed studies, the SC intervention under investigation was explicitly compared—with regard to  
411 costs and outcome measures—with one or more alternatives (in most cases, the “usual care” alternative). Most  
412 studies, except for four [75, 115, 119, 121], reported the ICER<sub>1</sub> of SCIs. ~~The ICER is calculated according to  
413 the following formula:~~

414 
$$ICER = \Delta C / \Delta E$$

415 ~~where  $\Delta C$  is the difference in mean costs between the intervention under evaluation and the comparator, and  
416  $\Delta E$  is the mean difference in outcome between the intervention under evaluation and the comparator.~~ When  
417 the outcome is measured in terms of utility values to account for the patient's and/or carer's QoL (e.g., using  
418 the Quality Adjusted Life Years [QALYs] gained), the cost-effectiveness analysis takes the form of a cost-

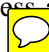

419 utility analysis. Some studies [111, 114, 119, 124-125] calculated the net-benefits (NB) of supportive care  
420 interventions using a series of hypothetical values for the decision maker's willingness-to-pay ( $\omega$ ) for an  
421 additional unit of outcome (e.g., a one-point difference in the Neuropsychiatric Inventory [NPI] score):

$$422 \quad NB = \omega * \Delta E - \Delta C$$

423 Ten studies were pure cost-effectiveness analyses [65, 68, 71, 108-109, 113, 116, 120, 122, 124], ten were  
424 cost-utility analyses [59, 61-64, 67, 73-74, 114, 123], ten developed both a cost-effectiveness and a cost-utility  
425 analysis [58, 66, 72, 110-112, 115, 117-118, 125], two were cost-consequence analyses [75, 121], and one was  
426 a cost-benefit analysis [119].

427

## 428 **Quality assessment of the included studies**

429

430 As indicated above, we also assessed the methodological quality of the studies included in the review using  
431 the CHEC checklist [80]. Based on the scores assigned, studies were classified as being high-, medium-, or  
432 low-quality. The quality level of the study is reported in the last columns of Tables 3, 4, and 5. Overall, only  
433 two studies [59,123] met all 19 criteria defined in the checklist. Applying the CHEC criteria described in the  
434 Materials and methods section, we found 11 high-quality studies, 15 medium-quality studies, and 7 low-quality  
435 ones. Details on the ratings of the studies can be found in Supporting information (S1, S2, and S3 Tables).

436

## 437 **Evidence of cost-effectiveness of supportive care interventions from** 438 **reviewed studies**

439

440 In this section, we describe the results of the qualitative analysis of the studies considered in the systematic  
441 review by distinguishing between studies providing evidence of high cost-effectiveness of SCIs (Table 3),  
442 those showing evidence of moderate cost-effectiveness (Table 4), and those showing very little or no evidence  
443 of cost-effectiveness (Table 5).

444 Tables 3, 4, and 5 report the main characteristics of the analysed studies, including type of assessed intervention  
445 (e.g., cognitive, physical activity, indirect, or multicomponent); description of the intervention under



446 evaluation; country where the intervention was implemented; type of study, type of economic evaluation, and  
447 time horizon; sample size (i.e., number of PwDs and caregivers considered in the study as well as the size of  
448 intervention and control groups); patient outcome measures; caregiver outcome measures; mean ICER or other  
449 cost-effectiveness measures (e.g., the intervention's net benefit); and assessed quality of the study.

450

### 451 **Interventions with evidence of high cost-effectiveness**

452 Out of the 33 studies included in the systematic review, 10 provided evidence of the high cost-effectiveness of  
453 SCIs (see Table 3).

454

455  
456  
457

**Table 3. Studies that find evidence of high cost-effectiveness of supportive care interventions.**

| Study                    | Type of intervention | Intervention Description and Comparator (Setting)                                                                                                                                | Country     | Type of study and economic evaluation (Time horizon)         | Sample size No. PwDs/No. Caregivers (Intervention Group/Control Group) | Perspective                   | PwD Outcome measures                                                                                                                                         | Caregiver Outcome measures                                                                                            | Incremental Cost-Effectiveness Ratio (ICER) and other cost-effectiveness measures                 | Quality of the study |
|--------------------------|----------------------|----------------------------------------------------------------------------------------------------------------------------------------------------------------------------------|-------------|--------------------------------------------------------------|------------------------------------------------------------------------|-------------------------------|--------------------------------------------------------------------------------------------------------------------------------------------------------------|-----------------------------------------------------------------------------------------------------------------------|---------------------------------------------------------------------------------------------------|----------------------|
| Gitlin et al. 2010 [116] | Cognitive            | Tailored Activity Program (TAP) for patients and caregivers (occupational therapy) vs Wait-list<br><br>(Community-based: home)                                                   | USA         | RCT<br>CEA<br><br>(4 months)                                 | 60 / 60<br><br>(30 / 30)                                               | Societal                      | ----                                                                                                                                                         | •Caregiving time spent "doing things"<br>•Caregiving time spent "being on duty"                                       | \$2.37 per hour saved/day ("doing things"),<br>\$1.10 per hour saved/day ("being on duty")        | Low                  |
| Graff et al. 2008 [108]  | Cognitive            | Community occupational therapy (including cognitive and behavioural interventions) vs Usual Care (Community-based: Memory clinics, Day clinics of a geriatrics department, home) | Netherlands | RCT<br>CEA<br><br>(6 weeks;<br>3 months)                     | 135 / 135<br><br>(68 / 67)                                             | Societal                      | •Daily functioning (AMPS; IDDD)                                                                                                                              | •Sense of competence (SCQ)                                                                                            | €1,748 saved compared with control (difference in mean total care costs per successful treatment) | High                 |
| Wimo et al. 1995 [63]    | Indirect             | Group living for dementia patients vs Home living and Institutional living<br><br>(Group living)                                                                                 | Sweden      | Markov model<br>CUA<br><br>(Expected life-length of 8 years) | 108 / 0<br><br>(46 / 39;23)                                            | Health and social care system | •Degree of dementia (GDS)<br>•QALYs gained (IWB scale)                                                                                                       | ----                                                                                                                  | Incremental cost per QALY gained < 0 (intervention less costly and more effective)                | Medium               |
| Melis et al. 2008 [109]  | Indirect             | Dutch Geriatric Intervention Programme (nurse visits) vs Usual Care<br><br>(Community-based: home)                                                                               | Netherlands | RCT<br>CEA<br><br>(6 months)                                 | 151 / 0<br><br>(85 / 66)                                               | Health and social care system | •IADLs (GARS-3)<br>•Mental well-being (MOS-20MH)                                                                                                             | ----                                                                                                                  | €3,500 per successful treatment                                                                   | Medium               |
| Nichols et al. 2008 [68] | For Caregivers       | Psychosocial intervention for caregivers (REACH II) Vs Usual care<br><br>(Community-based: home)                                                                                 | USA         | RCT<br>CEA<br><br>(6 months)                                 | 112 / 112<br><br>(55 / 57)                                             | Societal                      | •Cognitive impairment (MMSE)<br>•Behavioural and psychological symptoms (RMBPC)<br>•ADLs (Katz scale)<br>•IADLs (Lawton Brody scale)<br>•Service utilisation | •Time spent caregiving<br>•Caregiver bother (RMBPC)<br>•Depression (CES-D)<br>•Service utilisation<br>•Social support | \$4.96 per hour not spent in caregiving                                                           | Medium               |

458

| Study                        | Type of intervention | Intervention Description and Comparator (Setting)                                                                                                           | Country | Type of study and economic evaluation (Time horizon) | Sample size No. PwDs/No. Caregivers (Intervention Group/Control Group) | Perspective                   | PwD Outcome measures                                                                                                                                                                                                                                | Caregiver Outcome measures                                                                                                                        | Incremental Cost-Effectiveness Ratio (ICER) and other cost-effectiveness measures                                                                                         | Quality of the study |
|------------------------------|----------------------|-------------------------------------------------------------------------------------------------------------------------------------------------------------|---------|------------------------------------------------------|------------------------------------------------------------------------|-------------------------------|-----------------------------------------------------------------------------------------------------------------------------------------------------------------------------------------------------------------------------------------------------|---------------------------------------------------------------------------------------------------------------------------------------------------|---------------------------------------------------------------------------------------------------------------------------------------------------------------------------|----------------------|
| Knapp et al. 2013 [66]       | For Caregivers       | Individual therapy program for caregivers (START) vs Usual Care alone<br><br>(Community-based: mental health and neurological outpatient dementia services) | UK      | RCT<br>CEA+CUA<br><br>(8 months)                     | 260 / 260<br><br>(173 / 87)                                            | Health and social care system | •Behavioural and psychological symptoms (NPI)                                                                                                                                                                                                       | •Depression and anxiety (HADS)<br>•Quality of life (EQ-5D)<br>•Caregiver burden (ZBI)<br>•Coping strategies (COPE)                                | £6,000 per QALY gained (caregiver),<br>£118 per HADS point (caregiver)                                                                                                    | High                 |
| Livingston et al. 2014 [117] | For Caregivers       | Individual therapy program for caregivers (START) vs Usual Care alone<br><br>(Community-based: mental health and neurological outpatient dementia services) | UK      | RCT<br>CEA+CUA<br><br>(24 months)                    | 209 / 209<br><br>(140 / 69)                                            | Health and social care system | •Dementia severity (CDR)<br>•Quality of life (QoL-AD)<br>•Behavioural and psychological symptoms (NPI)<br>•Service utilisation (CSRI)                                                                                                               | •Depression and anxiety (HADS)<br>•Quality of life (EQ-5D)<br>•Caregiver burden (ZBI)<br>•Coping strategies (COPE)<br>•Service utilisation (CSRI) | £244 per QoL-AD point (patient)<br>£12,400 per QALY gained (caregiver)<br>£179 per HADS point (caregiver)<br>[carer-only costs]                                           | Medium               |
| Livingston et al. 2019 [118] | For Caregivers       | Individual therapy program for caregivers (START) vs Usual Care alone<br><br>(Community-based: mental health and neurological outpatient dementia services) | UK      | RCT<br>CEA<br><br>(6 years follow-up)                | 222 / 222<br><br>(150 / 72)                                            | Health and social care system | •Behavioural and psychological symptoms (NPI)<br>•Service utilisation (CSRI)                                                                                                                                                                        | •Depression and anxiety (HADS)<br>•Caregiver burden (ZBI)<br>•Service utilisation (CSRI)                                                          | Mean difference in HADS scores of -2.00 points with no significant difference in patient and caregiver costs (intervention is more effective than TAU and costs the same) | Medium               |
| Ballard et al. 2018 [71]     | Multicomponent       | WHELD intervention (person-centred care, management of agitation, physical exercise and psychosocial approaches) vs Usual Care alone<br><br>(Nursing Home)  | UK      | RCT<br>CEA<br><br>(9 months)                         | 553 / 0<br><br>(257 / 296)                                             | Health and social care system | •Quality of life (DEMQOL Proxy)<br>•Dementia severity (CDR, FAST)<br>•Agitation (CMAI)<br>•Behavioural and psychological symptoms (NPI)<br>•Mood (CSSD)<br>•Antipsychotic drug use<br>•Quality of interaction (QUIS)<br>•Service utilisation (CSRI) | ----                                                                                                                                              | Incremental cost per unit of effectiveness < 0 (intervention less costly and more effective)                                                                              | Medium               |
| Romeo et al. 2019 [72]       | Multicomponent       | WHELD intervention (person-centred care, management of agitation, physical exercise and psychosocial approaches) vs Usual Care alone<br><br>(Nursing Home)  | UK      | RCT<br>CEA+CUA<br><br>(9 months)                     | 549 / 0<br><br>(267 / 282)                                             | Health and social care system | •Agitation (CMAI)<br>•Quality of life (DEMQOL Proxy)<br>•Service utilisation (CSRI)                                                                                                                                                                 | ----                                                                                                                                              | -£137,978 per QALY gained<br>-£348 per CMAI point (intervention less costly and more effective)                                                                           | Medium               |

459 *Legend*  
460 ADLs: Activities of Daily living; AMPS: assessment of motor and process skills-process scale; CDR: Clinical Dementia Rating; CES-D: Center for Epidemiologic Studies Depression Scale; CMAI = Cohen- Mansfield Agitation  
461 Inventory; COPE: self-completed measure of carer coping strategies; CSRI: Client Service Receipt Inventory; CSSD: Cornell Scale for Depression in Dementia; CUA: Cost-utility analysis; DEMQOL Proxy: Dementia Quality of Life  
462 score reported by a carer; EQ-5D: EuroQol-5 Dimensions; GARS-3: Groningen Activity Restriction Scale-3; GDS: Global Deterioration Scale; HADS: Hospital Anxiety and Depression Scale; IADLs: Instrumental Activities of Daily  
463 Living; IDDD: interview of deterioration in daily activities in dementia-performance scale, measures need for assistance; IWB: Index of well-being; MMSE: Mini-Mental State Examination; MOS-20MH: mental health subscale of the  
464 Medical Outcomes Study Short Form; NPI: Neuropsychiatric Inventory; QALYs: Quality Adjusted Life Years; QoL-AD: Quality of Life-Alzheimer's Disease scale; QUIS: Quality of Interactions Scale; RCT: Randomised controlled  
465 trial; RMBPC: Revised Memory and Behavior Problem Checklist; SCQ: Sense of competence questionnaire; ZBI: Zarit Burden Interview (self-reported questionnaire used to assess carer burden).

466 **Cognitive stimulation**

467 Gitlin et al. [116] analysed an occupational therapy intervention referred to as the “Tailored Activity Program”  
468 (TAP), which was directed at community-dwelling patient-caregiver dyads. The effectiveness of TAP was  
469 measured in terms of the additional unit of benefit measured by caregiver hours per day of “doing things” and  
470 “being on duty” (i.e., TAP was able to reduce carer time inputs); accordingly, the ICER was expressed as the  
471 cost to bring about one additional unit of benefit. The intervention was found to be cost-effective: the ICER  
472 was \$2.37 per hour saved every day by the caregiver in terms of “doing things”, and \$1.10 per hour saved  
473 every day in terms of “being on duty”. However, due to the absence of primary outcomes (no measures of  
474 patient and carer health and QoL were considered) and other drawbacks, the quality of evidence of cost-  
475 effectiveness according to the CHEC was rather low (see S1 Table in Supporting information).

476 Graff et al. [108] studied another form of community-based occupational therapy that included both  
477 behavioural and cognitive interventions; even in this case, the programme was aimed at patient-caregiver  
478 dyads. The intervention consisted of 10 sessions of occupational therapy administered over five weeks,  
479 including cognitive and behavioural interventions, to train patients in the use of aids to compensate for  
480 cognitive decline and caregivers in coping behaviours and supervision. The authors found average savings of  
481 approximately €1,748 per couple who had been successfully treated with the considered occupational therapy  
482 compared to usual care; the probability of occupational therapy being the dominant intervention (i.e., more  
483 effective and less costly) was estimated to be 94%. They concluded that the community occupational therapy  
484 intervention for PwDs and their caregivers was cost-effective, especially in terms of informal caregiving.

485

486 **Indirect interventions**

487 A Swedish prospective study [63] on group living for dementia patients with a Global Deterioration Scale  
488 (GDS) score between four and seven compared the cost-effectiveness of this type of intervention with that of  
489 living at home or in nursing homes. Group living is considered an intermediate level of care between home  
490 and institutionalisation. The authors applied a cost-utility analysis using a Markov model of an expected life-  
491 length of eight years. They considered a sample of 108 PwDs, for which 46 patients in group living were  
492 compared to 39 patients living at home and 23 institutionalised patients. They found the intervention to be

493 highly cost-effective and dominant (the ICER, measured in terms of cost per QALY, was negative) compared  
494 to both institutionalisation and living at home.

495 Melis et al. [109] evaluated the cost-effectiveness of the Dutch Geriatric Intervention Programme, consisting  
496 of regular nurse visits for community-dwelling frail older people, including PwDs. The difference in the  
497 treatment effect was calculated as the difference in the proportions of successfully treated patients (prevention  
498 of functional decline together with improved wellbeing). The ICER was expressed as the total incremental cost  
499 per successful treatment, and it was roughly €3,500 (-21,458 to 45,362). The intervention had a 95%  
500 probability of being cost-effective compared with usual care at a willingness-to-pay (WTP) threshold of  
501 €34,000.

502

### 503 **Interventions for carers**

504 Nichols et al. [68] performed a cost-effectiveness analysis on a psychosocial intervention (REACH II) for  
505 caregivers of community-dwelling dementia patients, consisting of individual sessions and telephone-  
506 administered support group sessions. The intervention included components that targeted five problem areas  
507 linked to caregiver risk and QoL: caregiver burden, emotional wellbeing, self-care and healthy behaviours,  
508 social support, and care-recipient problem behaviours. In this case, the ICER represented the cost of an  
509 additional hour of non-caregiving time that could be “purchased” by the intervention. There was no significant  
510 difference in formal healthcare use between the control and intervention dyads, while there was a significant  
511 reduction of hours of provided care for the caregivers in the intervention group compared to those in the control  
512 group. Nichols et al. found that the six-month intervention was cost-effective if one was willing to spend \$4.96  
513 per day for one extra hour of non-caregiving time for each caregiver; moreover, the intervention could be  
514 thought of as being financially positive because it resulted in \$10.56 of time gained versus \$4.96 of intervention  
515 cost per hour per day per caregiver.

516 Three studies [66, 117-118] analysed the cost-effectiveness of the “Strategies for Relatives” (START)  
517 intervention, an individual psychosocial therapy programme aimed at informal caregivers to help them cope  
518 with the illness faced by their non-institutionalised relative. This particular approach consists of an eight-  
519 session, manual-based coping intervention delivered by supervised psychology graduates to family carers of  
520 PwDs in addition to usual treatment. In one of these studies, Knapp et al. [66] examined the short-term (eight

521 months) cost-effectiveness of START, and they found that the START mean cost per QALY gained was  
522 £6,000, and the intervention had a greater than 99% chance of being cost-effective compared with usual  
523 treatment alone at a WTP threshold of £30,000 per QALY gained, which is within the threshold range of  
524 £20,000–30,000 per QALY currently used by the British National Institute for Health and Care Excellence  
525 (NICE) [126]. Moreover, START showed a high probability of cost-effectiveness on the HADS-T (Hospital  
526 Anxiety and Depression Scale) measure.

527 In another study, Livingston et al. [117] analysed the 24-month impact on patient and caregiver outcomes (with  
528 a follow-up rate of 80%) and found that START was cost-effective for both, with a 67% probability of cost-  
529 effectiveness at the £20,000 per QALY willingness-to-pay threshold and 70% at the £30,000 threshold. A 2019  
530 follow-up by Livingston et al. [118] found that, after six years, the intervention remained clinically effective  
531 with no significant difference between the treated and the control group in terms of costs and time to care home  
532 admission or death; however, carers in the control group were five times more likely to have clinically  
533 significant depression.

534

### 535 **Multicomponent interventions**

536 A widely studied multicomponent strategy is the UK-based “Improving Wellbeing and Health for People with  
537 Dementia” (WHELD) intervention, which is targeted towards patients in nursing homes. This approach  
538 consists of a protocol to manage agitation coupled with physical exercise and psychosocial activities, all within  
539 a person-centred care framework. The protocol is focused on training care staff and promoting tailored person-  
540 centred activities and social interactions; it also involves the development of a system for triggering the  
541 appropriate review of antipsychotic medications by the prescribing physician.

542 A preliminary study by Ballard et al. [71] found evidence of the potential cost-effectiveness of WHELD. In  
543 particular, the intervention produced significant (albeit small) benefits in terms of patients’ QoL measured with  
544 a Dementia Quality of Life (DEMQOL) proxy (i.e., the DEMQOL score reported by the carer), agitation, and  
545 overall neuropsychiatric symptoms, especially for people with moderately severe dementia; antipsychotic drug  
546 use was at a low stable level in both the treatment and control groups. Taking into account the cost of the  
547 intervention and the total health and social care costs, the authors found that the WHELD intervention reduced  
548 costs compared to usual care; therefore, the benefits achieved were associated with cost savings.

549 In another study, Romeo et al. [72] evaluated WHELD cost-effectiveness and cost-utility and found that the  
550 intervention was cost-effective compared to usual care alone across a wide range of WTP on the part of a  
551 decision maker for a unit improvement in outcome (the considered outcome measures were the Cohen-  
552 Mansfield Agitation Inventory [CMAI] and dementia-related QoL according to the DEMQOL-Proxy). The  
553 cost-effectiveness was mostly attributed to the lower health and social care costs faced by the intervention  
554 group compared to the control group. The authors also found that these results were mainly relevant to residents  
555 with clinically significant agitation in dementia.

556

### 557 **Interventions with evidence of moderate cost-effectiveness**

558 Evidence of the moderate cost-effectiveness of several SCIs was found in 14 of the analysed studies (see Table  
559 4).

560

561

562

563

**Table 4. Studies that find evidence of moderate cost-effectiveness of supportive care interventions.**

| Study                     | Type of intervention | Intervention Description and Comparator (Setting)                                                                                                        | Country   | Type of study and economic evaluation (Time horizon) | Sample size No. PwDs /No. Caregivers (Intervention Group/Control Group) | Perspective                                     | PwD Outcome measures                                                                                                                                                                                                                  | Caregiver Outcome measures                                                                                                                                                                              | Incremental Cost-Effectiveness Ratio (ICER) and other cost-effectiveness measures                                                        | Quality of the study |
|---------------------------|----------------------|----------------------------------------------------------------------------------------------------------------------------------------------------------|-----------|------------------------------------------------------|-------------------------------------------------------------------------|-------------------------------------------------|---------------------------------------------------------------------------------------------------------------------------------------------------------------------------------------------------------------------------------------|---------------------------------------------------------------------------------------------------------------------------------------------------------------------------------------------------------|------------------------------------------------------------------------------------------------------------------------------------------|----------------------|
| Clare et al. 2019 [110]   | Cognitive            | Cognitive rehabilitation (GREAT trial) vs Usual Care<br>(Community-based: home)                                                                          | UK        | RCT<br>CEA + CUA<br><br>(3 months<br>6 months)       | 427 / 427<br><br>(209 / 218)                                            | •Health and social care system<br><br>•Societal | •Self-reported goal attainment (BGSI)<br>•Quality of life (DEMQOL)<br>•Depression and anxiety (HADS)<br>•Self-efficacy (GSES)<br>•Cognitive impairment measures<br>•Service utilisation (CSRI)                                        | •Relatives' Stress Scale (RSS)<br>•Health status assessment<br>•Quality of life (EQ-5D, WHOQoL-BREF)                                                                                                    | £1,296 per BGSI point<br>£1,110,000 per QALY gained (patient), £632,000 per QALY gained (caregiver) (health and social care perspective) | High                 |
| Sado et al. 2020 [119]    | Cognitive            | Learning Therapy vs Usual Care<br>(Nursing Home)                                                                                                         | Japan     | Prospective study<br>CBA<br><br>(12 months)          | 57 / 0<br><br>(30 / 27)                                                 | Health and social care system                   | •Level of care needed (CT-CNLTC)<br>•Quality of life (EQ-5D)<br>•Cognitive impairment (MMSE, FAB)<br>•PMS/IADL                                                                                                                        | ----                                                                                                                                                                                                    | \$1,605 as net monetary benefit                                                                                                          | Medium               |
| Mervin et al. 2018 [120]  | Cognitive            | Plushie robot (PARO) or normal plushie vs Usual Care<br>(Nursing Home or other residential facility)                                                     | Australia | RCT<br>CEA<br><br>(10 weeks)                         | 415 / 0<br><br>(138; 140 / 137)                                         | Health and social care system                   | •Agitation (CMAI-SF)<br>•Medications                                                                                                                                                                                                  | ----                                                                                                                                                                                                    | AUS\$13.01 per CMAI-SF point averted (PARO), AUS\$12.85 per CMAI-SF point averted (plushie)                                              | Low                  |
| D'Amico et al. 2015 [111] | Cognitive            | Maintenance cognitive stimulation therapy vs Usual Care alone<br>(Different Settings: Nursing Home and Community Centre)                                 | UK        | RCT<br>CEA + CUA<br><br>(24 weeks)                   | 199 / 0<br><br>(106 / 93)                                               | •Health and social care system<br>•Societal     | •Cognitive impairment (ADAS-Cog, MMSE)<br>•Quality of life (QoL-AD, DEMQOL, EQ-5D)<br>•Behavioural and psychological symptoms (NPI)<br>•ADLs (ADCS-ADL)<br>•Service utilisation (CSRI)                                                | ----                                                                                                                                                                                                    | £26,835 per QALY, £266 per QoL-AD point, £558 per MMSE point                                                                             | Medium               |
| Orgeta et al. 2015 [112]  | Cognitive            | Carer-led individual cognitive stimulation therapy vs Usual Care<br>(Community-based: Memory clinics and community mental health teams for older people) | UK        | RCT<br>CEA+CUA<br><br>(13 weeks;<br>26 weeks)        | 273 / 273<br><br>(134 / 139)                                            | •Health and social care system<br>•Societal     | •Cognitive impairment (ADAS-Cog, MMSE)<br>•Quality of life (QoL-AD, DEMQOL-Proxy)<br>•Behavioural and psychological symptoms (NPI)<br>•BADLS<br>•Depression and anxiety (GDS),<br>•Relationship (QCPR)<br>•Service utilisation (CSRI) | •Mental and physical health (SF-12)<br>•Depression and anxiety (HADS)<br>Distress (NPI)<br>•Quality of life (EQ-5D)<br>•Carer resilience (RS-14)<br>•Relationship (QCPR)<br>•Service utilisation (CSRI) | £3,100 per QALY gained (caregivers)                                                                                                      | High                 |



| Study                            | Type of intervention | Intervention Description and Comparator (Setting)                                                               | Country     | Type of study and economic evaluation (Time horizon) | Sample size No. PwDs /No. Caregivers (Intervention Group/Control Group) | Perspective                                 | PwD Outcome measures                                                                                                                                                                                      | Caregiver Outcome measures                       | Incremental Cost-Effectiveness Ratio (ICER) and other cost-effectiveness measures                                                                                     | Quality of the study |
|----------------------------------|----------------------|-----------------------------------------------------------------------------------------------------------------|-------------|------------------------------------------------------|-------------------------------------------------------------------------|---------------------------------------------|-----------------------------------------------------------------------------------------------------------------------------------------------------------------------------------------------------------|--------------------------------------------------|-----------------------------------------------------------------------------------------------------------------------------------------------------------------------|----------------------|
| Knapp et al. 2006 [124]          | Cognitive            | Cognitive stimulation therapy vs Usual Care<br><br>(Different Settings: Nursing Home, Community and Day Centre) | UK          | RCT<br>CEA<br><br>(8 weeks)                          | 161 / 0<br><br>(91 / 70)                                                | •Health and social care system              | •Cognitive impairment (MMSE)<br>•Quality of life (QoL-AD)<br>•Service utilisation (CSRI)                                                                                                                  | ----                                             | £75.32 per MMSE point,<br>£22.82 per QoL-AD point                                                                                                                     | Medium               |
| D'Amico et al. 2016 [125]        | Physical activity    | Physical exercise regimen (walking) for patient-caregiver dyads vs Usual Care<br><br>(Community-based: home)    | UK          | RCT<br>CEA+CUA<br><br>(12 weeks)                     | 52 / 52<br><br>(30 / 22)                                                | •Health and social care system<br>•Societal | •Behavioural and psychological symptoms (NPI)<br>•General health (GHQ)<br>•Quality of life (DEMQL Proxy)<br>•Service utilisation (CSRI)                                                                   | •Caregiver burden (ZBI)                          | £421 per NPI point,<br>£1,055 per ZBI point,<br>£286,440 per QALY gained (societal perspective)                                                                       | Medium               |
| MacNeil Vroomen et al. 2016 [58] | Indirect             | Case management (Intensive Case Management Model or Linkage Model) vs Usual Care<br><br>(Community-based: home) | Netherlands | Prospective study<br>CEA+CUA<br><br>(24 months)      | 521 / 521<br><br>(234; 214 / 73)                                        | •Societal                                   | •Behavioural and psychological symptoms (NPI)<br>•Quality of life (EQ-5D)                                                                                                                                 | •Mental health (GHQ)<br>•Quality of life (EQ-5D) | €9,581.433 per QALY (ICMM vs control),<br>€2,236,139 per QALY (LM vs control)<br>(combined QALY of patient and caregiver)                                             | Medium               |
| Michalowsky et al. 2019 [59]     | Indirect             | Dementia Care Management (Delphi-MV trial) vs Usual Care<br><br>(Community-based: home)                         | Germany     | RCT<br>CUA<br><br>(24 months)                        | 444 / 0<br><br>(315 / 129)                                              | •Health and social care system              | • Health related Quality of life (SF-12)<br>•Cognitive impairment (MMSE)<br>•Depression and anxiety (GDS)<br>•B-ADL<br>•Comorbidity (CCI)<br>•Service utilisation (CSRI)<br>•Time to institutionalisation | ----                                             | Incremental cost per QALY < 0<br>€26,851 per QALY (PwD living with a caregiver )                                                                                      | High                 |
| Rädke et al. 2020 [115]          | Indirect             | Dementia Care Management (Delphi-MV trial) vs Usual Care<br><br>(Community-based: home)                         | Germany     | RCT<br>CUA<br><br>(24 months)                        | 444 / 0<br><br>(315 / 129)                                              | •Health and social care system              | • Health related Quality of life (SF-12)<br>•Cognitive impairment (MMSE)<br>•Depression and anxiety (GDS)<br>•B-ADL<br>•Comorbidity (CCI)<br>•Service utilisation (CSRI)                                  | ----                                             | Probability of cost-effectiveness at €40,000 per QALY is higher for females, patients living alone, patients with moderate dementia, patients with high comorbidities | High                 |

| Study                        | Type of intervention | Intervention Description and Comparator (Setting)                                                                                                                                            | Country     | Type of study and economic evaluation (Time horizon) | Sample size No. PwDs /No. Caregivers (Intervention Group/Control Group) | Perspective                    | PwD Outcome measures                                                                                                                                                                   | Caregiver Outcome measures           | Incremental Cost-Effectiveness Ratio (ICER) and other cost-effectiveness measures                                                                   | Quality of the study |
|------------------------------|----------------------|----------------------------------------------------------------------------------------------------------------------------------------------------------------------------------------------|-------------|------------------------------------------------------|-------------------------------------------------------------------------|--------------------------------|----------------------------------------------------------------------------------------------------------------------------------------------------------------------------------------|--------------------------------------|-----------------------------------------------------------------------------------------------------------------------------------------------------|----------------------|
| Wimo et al. 1994 [65]        | Indirect             | Adult Day Care vs Wait-list<br>(Community-based: Day Care)                                                                                                                                   | Sweden      | Prospective study<br>CEA<br>(12 months)              | 100 /0<br>(55 / 45)                                                     | •Health and social care system | •Quality of life (IWB, Rosser index)<br>•Cognitive impairment (MMSE)<br>•ADLs and Behaviour (MDDAS)                                                                                    | ----                                 | Incremental cost per unit of effectiveness < 0 for patients with severe psychosocial stress situation (intervention less costly and more effective) | Medium               |
| Van de Ven et al. 2014 [121] | Indirect             | Dementia Care Mapping Vs Usual care<br>(Nursing Home)                                                                                                                                        | Netherlands | RCT<br>CCA<br>(18 months)                            | 318 / 319<br>(PwD: 154/164)<br>(Staff: 141/178)                         | •Health and social care system | •Service utilisation<br>•Antipsychotic drug use<br>•Falls and fractures                                                                                                                | •Absenteeism                         | N.A.                                                                                                                                                | Low                  |
| Gaugler et al. 2003 [122]    | For Caregivers       | Adult day care service to support caregivers vs Usual Care<br>(Community-based: Day Care)                                                                                                    | USA         | Prospective study<br>CEA<br>(3 months; 1 year)       | 0 /201<br>(80/121)                                                      | Societal                       | •Behaviour Problem Scale<br>•ADL                                                                                                                                                       | •Stress (ROS)<br>•Depression (CES-D) | \$4.51/day per unit of ROS score<br>\$2.20/day per unit of CES-D score (over 1-year period)                                                         | Low                  |
| Wolfs et al. 2011 [73]       | Multicomponent       | Integrated approach (map of the patient and caregiver needs to develop a personalised treatment course) vs Usual Care<br>(Community-based: Diagnostic research centre for psycho-geriatrics) | Netherlands | RCT<br>CUA<br>(1 year)                               | 219 /0<br>(131 /88)                                                     | Societal                       | •Quality of life (EQ-5D)<br>•Cognitive impairment (MMSE)<br>•Behavioural and psychological symptoms (NPI)<br>•IADLs (Lawton Brody scale)<br>•Depression (CSDD)<br>•Service utilisation | ----                                 | €1,267 per QALY gained                                                                                                                              | Low                  |

565  
566  
567  
568  
569  
570  
571  
572  
573  
574

#### Legend

ADAS-Cog: Alzheimer's Disease Assessment Scale-Cognition subscale; ADCS-ADL: Alzheimer's Disease Cooperative Study-Activities of Daily Living Inventory; B-ADL: Bayer-Activities of Daily Living Scale; BADLS: Bristol Activities of Daily Living Scale; CCA: Cost consequence analysis; CCI: Charlson Comorbidity Index; CEA: Cost-effectiveness analysis; CES-D: Center for Epidemiologic Studies Depression Scale; CMAI-SF = Cohen-Mansfield Agitation Inventory-Short Form; CSDD: Cornell Scale for Depression in Dementia; CSRI: Client Service Receipt Inventory; CUA: Cost-utility analysis; DEMQOL: Dementia Quality of Life score; DEMQOL Proxy: Dementia Quality of Life score reported by a carer; EQ-5D: EuroQol-5 Dimensions; FAB: Frontal Assessment Battery; GDS: Geriatric Depression Scale; GHQ: General Health Questionnaire; GSES: Generalized Self-Efficacy Scale; HADS: Hospital Anxiety and Depression Scale; IWB: Index of well-being; MDDAS: Multi-Dimensional Dementia Assessment Scale; MMSE: Mini-Mental State Examination; NPI: Neuropsychiatric Inventory; PMS/IADL: Physical Self-Maintenance Scale/Instrumental Activity of Daily Living; QCPR: Quality of Caregiver-Patient Relationship; QoL-AD: Quality of Life-Alzheimer's Disease scale; RCT: Randomised controlled trial; ROS: Role Overload Scale; RS-14: Resilience Scale-14 items; RSS: Relatives' Stress Scale; SF-12: Short Form questionnaire-12 items; ZBI: Zarit Burden Interview (self-reported questionnaire used to assess carer burden); WHOQoL-BREF: World Health Organization's Quality of Life Instrument – brief version.

575 **Cognitive stimulation**

576 Clare et al. [110] developed a single-blind multicentre RCT (Goal-Oriented Cognitive Rehabilitation in Early-  
577 Stage Alzheimer's and Related Dementias Trial [GREAT]) in order to provide evidence of the clinical and  
578 cost-effectiveness of a cognitive rehabilitation programme for people with mild to moderate dementia and their  
579 caregivers. The individualised intervention consisted of 10 therapy sessions administered over three months,  
580 followed by four maintenance sessions over six months, delivered in participants' homes under the direction  
581 and assistance of a cognitive rehabilitation therapist. The therapists (nine occupational therapists and one  
582 nurse) worked with the patient and the carer to identify realistic and relevant goals, plan how to tackle them,  
583 and support people in achieving them. The primary outcome was the participant rating of goal attainment, and  
584 goals were elicited using the Bangor Goal-Setting Interview (BGSi), with goal attainment assessed using a  
585 validated rating scale on which a two-point improvement was considered to be clinically significant. For the  
586 intervention group, participant attainment ratings improved at the three-month follow-up by 2.57 points on  
587 average, and this improvement was maintained at nine months; average ratings in the TAU group showed a  
588 negligible improvement of less than one point at three months. Patient's and carer's QoLs (measured with  
589 several instruments) were considered a secondary outcome together with other measures; however, there were  
590 no significant changes in any secondary outcome measures following the intervention. Clare et al. also  
591 performed both a cost-effectiveness and a cost-utility analysis of the cognitive rehabilitation programme  
592 conducted, first, from a health and social care perspective and, second, from a societal perspective. The cost  
593 of an increase of 1.32 points in the BGSi attainment rating was £1,296 from the health and social care  
594 perspective and -£9 from the societal perspective; the intervention could be considered cost-effective in terms  
595 of achieving an improvement in participant-rated goal attainment, with the WTP being £2,500 and above under  
596 both the societal and healthcare system perspectives. However, in both studies, there was no evidence for cost-  
597 effectiveness either in terms of QALY gains for PwDs (measured with DEMQOL) or in terms of QALY gains  
598 for carers (measured with the EuroQol - 5 Dimensions [EQ-5D] three-level version).

599 Sado et al. [119] performed an initial cost-benefit analysis of learning therapy for nursing home patients, which  
600 is an intervention that combines different cognitive activities (e.g., simple math calculations, reading tasks,  
601 and conversations) undertaken under the guidance and acknowledgement of an instructor. The primary  
602 outcomes were safety, validity of eligibility, retention rate, and effect on the functions of daily living

603 represented by Criterion Time for Certification of Needed Long-Term-Care (CT for CNLTC) at 12 months.  
604 The authors offered preliminary evidence that the intervention improved the patients' function of daily living  
605 (but not their cognitive function) at 12 months and had a cost-saving effect, thus determining a yearly net  
606 monetary benefit per patient (in terms of lower long-term care costs) of \$1,605; the probability of the net  
607 monetary benefit being beyond zero was around 91%. However, they concluded that a RCT was required to  
608 verify these findings.

609 Mervin et al. [120] assessed the cost-effectiveness of regular use of a therapeutic pet-type robot (PARO)  
610 compared with a normal plush toy and usual care for reducing agitation and medication use in institutionalised  
611 dementia patients. The residential facilities were randomised to one of three groups: PARO (individual, non-  
612 facilitated 15-minute sessions on three afternoons per week for 10 weeks), plush toy (as per PARO, but with  
613 artificial intelligence disabled), and usual care. The incremental cost-effectiveness was measured as the  
614 incremental cost per unit improvement in agitation between the two comparative groups (PARO or plush toy  
615 vs usual care). The study could not find evidence of a substantial cost-effectiveness for the use of the robotic  
616 plushie compared with usual care: the incremental cost per unit improvement in the Cohen-Mansfield Agitation  
617 Inventory-Short Form (CMAI-SF) was AU\$13.01 for the PARO group and AU\$12.85 for the plush toy group.  
618 The authors concluded that an inexpensive plush toy may offer greater value for money than the PARO in  
619 terms of improving agitation specifically, with an incremental cost per unit in the CMAI-SF of AU\$2.17.  
620 However, they underline that these costs are also much lower than values estimated for other psychosocial  
621 group activities (from approximately AU\$280 to AU\$6,030) and sensory interventions (from approximately  
622 AU\$42 to AU\$248), suggesting that both a plush toy and the PARO may be cost-effective psychosocial  
623 treatment options for agitation.

624 D'Amico et al. [111] analysed a maintenance CST intervention added to usual care and directed at people with  
625 mild to moderate dementia in nine care homes and nine community centres. They performed both cost-  
626 effectiveness and cost-utility analyses within a multicentre, single-blind, pragmatic RCT with a subgroup  
627 analysis for people taking acetylcholinesterase inhibitors. Participants received the treatment for seven weeks  
628 and were randomised to either the weekly maintenance of cognitive stimulation programme added to usual  
629 care or usual care alone for 24 weeks. The authors found that the intervention was cost-effective in terms of  
630 increased QoL, which was measured using proxy EQ-5D ratings; the mean ICER was about 26,835 per QALY,

631 and the probability that the intervention would be cost-effective was 54% at the NICE’s specified threshold of  
632 £30,000/QALY [126]. The intervention was also cost-effective in terms of reducing cognitive impairment as  
633 measured with MMSE (Mini Mental State Examination) scores, but not when measured with the Alzheimer’s  
634 Disease Assessment Scale-Cognitive (ADAS-Cog). Moreover, the authors noted that the intervention, in  
635 combination with acetylcholinesterase inhibitors, was more cost-effective than using inhibitors alone on top  
636 of usual care.

637 Orgeta et al. [112] performed a clinical effectiveness and cost-effectiveness pragmatic, multicentre, RCT of a  
638 home-based, individual CST intervention for PwDs and their family carers, which was then compared with  
639 treatment as usual. The intervention consisted of structured cognitive stimulation sessions for PwDs completed  
640 up to three times weekly over 25 weeks. Family caregivers were supported to deliver the sessions at home.  
641 Primary outcomes were cognition and QoL for the PwDs, and mental/physical health (measured with the Short  
642 Form questionnaire with 12 items) for the family carers. Carers’ utility scores were calculated from the EQ-  
643 5D by applying published societal weights. They found limited evidence of cost-effectiveness mostly in terms  
644 of caregiver’s health-related QoL: the incremental health and social care cost per caregiver’s QALY gained  
645 was approximately £3,100; the probability of the intervention being cost-effective at a WTP per QALY of  
646 approximately £30,000 was 81% from the health and social care perspective and 93% from the societal  
647 perspective.

648 Through a consideration of cognition (measured using the MMSE) as the primary outcome and the patient’s  
649 QoL (using Quality of Life in Alzheimer’s Disease scale [QoL-AD]) as the secondary outcome, Knapp et al.  
650 [124] analysed the cost-effectiveness of an evidence-based CST delivered to dementia patients in nursing  
651 homes and day centres. The Cochrane systematic reviews on reality orientation and reminiscence therapy for  
652 dementia were used to develop a group programme of evidence-based CST. Despite the short follow-up period  
653 (eight weeks), the intervention was found to be potentially cost-effective with regard to both outcome  
654 measures.

655

## 656 **Physical activity**

657 D’Amico et al. [125] examined the cost-effectiveness of a physical activity intervention—a regular and  
658 individually tailored walking regimen—directed at community-dwelling patient-caregiver dyads. The exercise

659 intervention was significantly more cost-effective than treatment, as usual, from both the societal and health  
660 and social care perspectives in terms of improvements in behavioural and psychological symptoms (from a  
661 societal perspective, the ICER was £421 per incremental difference in the NPI score), while it did not appear  
662 to be cost-effective when considering QALY gains (the ICER per QALY calculated using the DEMQOL-  
663 Proxy scores and societal weights was £286,440). The authors observed that there was no established cost-  
664 effectiveness benchmark for the NPI with which to compare their estimates, while the estimated mean cost per  
665 QALY was rather high relative to the £30,000 upper threshold generally associated with cost-effectiveness  
666 judgements by NICE in the UK.

667

### 668 **Indirect interventions**

669 In an observational, controlled, cohort study, MacNeil Vroomen et al. [58] developed a preliminary analysis  
670 of the cost-effectiveness of two case management models adopted in the Netherlands for people with already  
671 diagnosed dementia and their informal caregivers against no access to case management (control group). The  
672 two models considered were the Intensive Case Management model (ICMM, in which case managers follow  
673 the patients and their families and help them navigate medical and psychosocial services) and the Linkage  
674 model (LM, which consists of cooperation between the multiple care providers the patients face in their  
675 journey). The economic evaluation related incremental costs to incremental effects regarding neuropsychiatric  
676 symptoms (measured with the NPI), the psychological health of the informal caregiver (measured with the  
677 General Health Questionnaire [GHQ]), and the QALYs of the PwD and informal caregiver (based on the  
678 EuroQoL - 5 Dimensions). They found preliminary evidence of cost-effectiveness for the ICMM compared to  
679 the control group (the probability that the ICMM was cost-effective in comparison with the control was 92%  
680 at a WTP of €30,000 per QALY) and the LM (the probability that the ICMM was cost-effective in comparison  
681 to the LM was 97% at a WTP of €30,000 per QALY), but additional evidence was needed due to the fact that  
682 the study was not a RCT.

683 Michalowsky et al. [59] evaluated a community-based DCM program versus usual care (Delphi-MV trial).  
684 DCM is a model of collaborative care aiming to support patients and their caregivers through coordination and  
685 management of treatment and care and consists of a nurse-led in-depth assessment of patients' unmet needs to  
686 optimise and individualise dementia treatments. The intervention was delivered in participants' homes by

687 nurses with dementia-specific qualifications. The analysis was conducted from the public payer perspective  
688 (considering only outcomes for PwDs) and based on 444 participants (315 in the intervention group, and 129  
689 in the control group) who completed the baseline and at least one follow-up assessment. The HRQoL of the  
690 PwDs was assessed via self-rating measures using the 12-item Short Form Health Survey (SF-12), which is  
691 considered suitable for mildly to moderately cognitively impaired PwDs. The responses to the SF-12 were  
692 converted to health utilities in order to calculate the QALYs for each patient. In the base-case analysis,  
693 compared with usual care, the DCM was associated with higher QALY and lower costs after 24 months. In  
694 particular, patients treated with the DCM faced higher costs for medications (i.e., higher prescription rates of  
695 anti-dementia drugs and medical aids) but had lower costs in terms of in-hospital treatments, nursing home  
696 care, and delayed institutionalisation (the time to institutionalisation was delayed on average seven months in  
697 patients who received the DCM). The probability of the DCM being cost-effective was 88% at a WTP of  
698 €40,000 per QALY gained, a value higher than the NICE's upper threshold.

699 A recent follow-up study by Rädke et al. [115] focused on subgroups of participants in the Delphi-MV trial  
700 to assess the differences in cost-effectiveness across the subgroups (if any). They found that patient  
701 characteristics significantly affected the cost-effectiveness of the DCM; at a WTP of €40,000 per QALY, the  
702 intervention was more likely to be cost-effective for females (a probability of 96% vs 16% for males), patients  
703 living alone (96% vs 26% for those not living alone), patients with a moderate-to-severe cognitive impairment  
704 (100% vs 3% for low cognitive impairment), patients with functional impairment (97% vs 16% for no  
705 functional impairment), and patients with a high comorbidity (96% vs 26% for low comorbidity).

706 Wimo et al. [65] developed a particular cost-effectiveness analysis (a “cost-effectiveness quotient analysis”)  
707 for three day care units for PwDs with a daily capacity of about nine dementia sufferers served by two specially  
708 trained dementia carers. Fifty-five patients in day care and 45 patients on a waiting list for day care (control  
709 group) were examined during 12 months in a prospective open non-randomised concurrent control study. All  
710 patients included in the study lived in their homes or at a home for the aged. The costs per patient per day were  
711 \$55 for the day care group and \$63 for the controls. Both groups deteriorated in the used indices of QoL (the  
712 Index of Wellbeing [IWB] and the Rosser index) during the study year, but the decline was stronger in the  
713 control group. The trend indicated that day care was both cost-saving and had better outcomes on the indices,  
714 and some underlying variables for the used indices (the ability to dress and undress, and cheerfulness) also

715 showed significantly better results in favour of day care. Since the changes between the groups were not  
716 significant regarding the cost-effectiveness quotient, the authors could not conclude that day care was more  
717 cost-effective than a care organisation without day care. However, for a subgroup of patients with the most  
718 distressed psychosocial situations, day care was shown to be cost-effective (i.e., it provided the same utilities  
719 [QoL indices] of the alternative option but at a lower cost).

720 Van de Ven et al. [121] investigated differences in the costs of care between a DCM protocol and usual care  
721 in a sample of Dutch nursing homes alongside an 18-month cluster-RCT, in which they studied the  
722 effectiveness of DCM on residents and staff outcomes (including 318 residents and 376 nursing staff  
723 members). Dementia special care units were randomly assigned to DCM or usual care. Nurses from the  
724 intervention care homes received DCM training, attended a DCM organisational briefing day, and conducted  
725 the four-month DCM intervention twice during the study. A single DCM cycle consisted of observation,  
726 feedback to the staff, and action plans for the residents. The authors measured costs related to health care  
727 consumption, falls, and psychotropic drug use at the resident level and absenteeism at the staff level. The  
728 authors found the DCM intervention to be cost-neutral compared to usual care. However, certain changes  
729 within costs could be observed. In particular, the intervention group showed lower costs associated with  
730 outpatient hospital appointments over time than the control group, while the use of antipsychotics decreased  
731 in both groups (this could be explained as a result of a steady change in the policy of elderly-care physicians  
732 to decrease the prescription rate of inappropriate psychotropic drugs). On the staff level, no significant  
733 difference between the intervention and control groups for costs associated with absenteeism was found. The  
734 authors concluded that, since several studies provided evidence that DCM has positive effects on resident  
735 outcome measures such as depression, agitation, and QoL, considerations other than costs might help to  
736 determine whether a nursing home should adopt this method.

737

### 738 **Interventions for carers**

739 A community-based adult day care service providing support to informal caregivers of PwDs was evaluated  
740 by Gaugler et al. [122]. Caregivers in the treatment condition were recruited from 45 adult day programmes.  
741 Both the treatment and control groups of caregivers were administered interviews at three intervals: baseline  
742 (T1), three months (T2), and one year (T3). Two longitudinal panels were constructed: a short-term (three



743 months) panel and a long-term (one year) panel. The considered caregiver outcomes were measured in terms  
744 of primary stress (through the 7-item Role Overload Scale [ROS]) and depression (using the 20-item Center  
745 for Epidemiological Studies Depression Scale [CES-D]). A variety of costs (e.g., adult day services, formal  
746 service use, informal sources of care, and employment changes) were estimated for caregivers. The ICERs  
747 were calculated as the cost necessary to alleviate role overload and depression by one unit both in the short  
748 and long term. In particular, the authors found that the daily costs necessary to alleviate role overload and  
749 depression by one unit among adult day service users were \$6.83 and \$2.90, respectively, over the short term,  
750 while these costs were reduced to \$4.51 and \$2.20, respectively, over the one-year period. The authors  
751 concluded that, with consistent utilisation over time, adult day services appeared to have become more cost-  
752 effective for caregivers and their care recipients. In fact, there was evidence that the long-term utilisation of  
753 day care could help to lessen the time caregivers spent managing symptoms associated with dementia and  
754 allow them to spend more time in work-related activities.

755

### 756 **Multicomponent interventions**

757 Wolfs et al. [73] studied an intervention adopted in the Netherlands that consisted of an integrated approach  
758 protocol involving the use of a diagnostic research centre for psycho-geriatrics. This centre was designed to  
759 enable health professionals to first map the needs of the community-dwelling patient and their caregiver, and  
760 then deliver a personalised treatment course consisting of different kinds of activities. They found that the  
761 intervention was cost-effective in terms of QoL (the ICER was €1,267 per QALY gained), but not in terms of  
762 improvements in clinical measures such as cognitive impairment or behavioural and psychological symptoms.

763

### 764 **Interventions without evidence of cost-effectiveness**

765 No or insufficient evidence of cost-effectiveness of SCIs has been found in nine of the analysed studies (see  
766 Table 5).

767

**Table 5. Studies that do not find evidence of cost-effectiveness of supportive care interventions.**

| Study                       | Type of intervention | Intervention Description and Comparator (Setting)                                                                                            | Country     | Type of study and economic evaluation (Time horizon) | Sample size No. PwDs /No. Caregivers (Intervention Group/Control Group) | Perspective                                                                                         | PwD Outcome measures                                                                                                                                                                                                                                                         | Caregiver Outcome measures                                                                                                                                                                                                                                          | Incremental Cost-Effectiveness Ratio (ICER) and other cost-effectiveness measures    | Quality of the study |
|-----------------------------|----------------------|----------------------------------------------------------------------------------------------------------------------------------------------|-------------|------------------------------------------------------|-------------------------------------------------------------------------|-----------------------------------------------------------------------------------------------------|------------------------------------------------------------------------------------------------------------------------------------------------------------------------------------------------------------------------------------------------------------------------------|---------------------------------------------------------------------------------------------------------------------------------------------------------------------------------------------------------------------------------------------------------------------|--------------------------------------------------------------------------------------|----------------------|
| Woods et al. 2012 [113]     | Cognitive            | Reminiscence group therapy vs Usual Care<br>(Community-based: Memory clinics and Community mental health teams for older people)             | UK          | RCT<br>CEA<br>(10 months)                            | 350 / 350<br>(206 / 144)                                                | •Health and social care system                                                                      | <ul style="list-style-type: none"> <li>•Quality of life (QoL-AD, EQ-5D)</li> <li>•Autobiographical memory (AMI (E))</li> <li>•Quality of relationship (QCPR)</li> <li>•Depression and anxiety (CSDD, RAID)</li> <li>•BADLs</li> <li>•Service utilisation (CSRI)</li> </ul>   | <ul style="list-style-type: none"> <li>•Mental health (GHQ-28)</li> <li>•Quality of life (EQ-5D)</li> <li>•Quality of relationship (QCPR)</li> <li>•Depression and anxiety (HADS)</li> <li>•Caregiving stress (RSS)</li> <li>•Service utilisation (CSRI)</li> </ul> | £2,586 per QoL-AD point                                                              | Medium               |
| Khan et al. 2019 [114]      | Physical activity    | Structured physical exercise (aerobic and resistance training at moderate-to-hard intensity) vs Usual Care<br>(Community-based: home)        | UK          | RCT<br>CUA<br>(12 months)                            | 494 / 494<br>(329 / 165)                                                | <ul style="list-style-type: none"> <li>•Health and social care system</li> <li>•Societal</li> </ul> | <ul style="list-style-type: none"> <li>•Cognitive impairment (ADAS-Cog)</li> <li>•ADLs (BADLs)</li> <li>•Quality of life (EQ-5D, QoL-AD)</li> <li>•Behavioral and psychological symptoms (NPI)</li> <li>•Service utilisation (CSRI)</li> <li>•Falls and fractures</li> </ul> | <ul style="list-style-type: none"> <li>•Quality of life (EQ-5D)</li> <li>•Caregiver burden (ZBI)</li> </ul>                                                                                                                                                         | - £74,227 per QALY gained (patient)<br>(intervention more costly and less effective) | High                 |
| Livingston et al. 2019 [61] | Indirect             | MARQUE intervention (mandatory training sessions for staff and implement new procedures to reduce agitation) vs Usual Care<br>(Nursing Home) | UK          | RCT<br>CUA<br>(8 months)                             | 318 / 354<br>(PwD: 155/163)<br>(Staff: 175/179)                         | •Health and social care system                                                                      | <ul style="list-style-type: none"> <li>•Agitation (CMAI)</li> <li>•Behavioural and psychological symptoms (NPI)</li> <li>•Dementia severity (CDR)</li> <li>•Antipsychotic drug use</li> <li>•Quality of life (DEMQOL, EQ-5D)</li> <li>•Service utilisation (CSRI)</li> </ul> | <ul style="list-style-type: none"> <li>•Caregiver burnout (MBI)</li> <li>•Sense of competence (SCD)</li> <li>•Abusive behaviour by staff (STS)</li> </ul>                                                                                                           | £14,064 per QALY gained (patient)                                                    | Medium               |
| Meeuwse et al. 2013 [62]    | Indirect             | Memory clinics (providing drugs and non-pharmacological interventions) vs Care by GP<br>(Community-based: Memory clinics)                    | Netherlands | RCT<br>CUA<br>(12 months)                            | 160 / 160<br>(83 / 77)                                                  | •Societal                                                                                           | <ul style="list-style-type: none"> <li>•Quality of life (EQ-5D)</li> <li>•ADLs</li> <li>•IADLs</li> <li>•Service utilisation</li> </ul>                                                                                                                                      | •Quality of life (EQ-5D)                                                                                                                                                                                                                                            | €41,442 per QALY lost (patient + caregiver)                                          | High                 |
| Drummond et al. 1991 [64]   | For Caregivers       | Caregiver support program (nurse visits, support groups and respite care) vs Usual Care<br>(Community-based: home)                           | Canada      | RCT<br>CUA<br>(6 months)                             | 0 / 42<br>(22 / 20)                                                     | •Health and social care system                                                                      | ----                                                                                                                                                                                                                                                                         | <ul style="list-style-type: none"> <li>•Depression (CES-D)</li> <li>•Anxiety (STAI)</li> <li>•Quality of life (CQLI)</li> </ul>                                                                                                                                     | CAS\$20,036 per QALY gained                                                          | Low                  |

| Study                             | Type of intervention | Intervention Description and Comparator (Setting)                                                                        | Country     | Type of study and economic evaluation (Time horizon) | Sample size No. PwDs/No. Caregivers (Intervention Group/Control Group) | Perspective                                 | PwD Outcome measures                                                                                                                                         | Caregiver Outcome measures                                                                        | Incremental Cost-Effectiveness Ratio (ICER) and other cost-effectiveness measures                                                            | Quality of the study |
|-----------------------------------|----------------------|--------------------------------------------------------------------------------------------------------------------------|-------------|------------------------------------------------------|------------------------------------------------------------------------|---------------------------------------------|--------------------------------------------------------------------------------------------------------------------------------------------------------------|---------------------------------------------------------------------------------------------------|----------------------------------------------------------------------------------------------------------------------------------------------|----------------------|
| Joling et al. 2013 [67]           | For Caregivers       | Family meetings vs Usual Care<br>(Community-based: home)                                                                 | Netherlands | RCT<br>CUA<br>(12 months)                            | 192 / 192<br>(96 / 96)                                                 | •Societal                                   | •Health Related Quality of life (SF-12)<br>•Service utilisation                                                                                              | •Health Related Quality of life (SF-12)<br>•Depression and anxiety (MINI)<br>•Service utilisation | -€807,703 per QALY (dyad),<br>-240,247 per QALY (patient),<br>-€24,472 per QALY (caregiver)<br>(intervention more costly and less effective) | High                 |
| Wilson et al. 2009 [123]          | For Caregivers       | Social care intervention for caregivers (contact with a befriender facilitator) vs Usual Care<br>(Community-based: home) | UK          | RCT<br>CUA<br>(15 months)                            | 0 / 190<br>(93 / 97)                                                   | •Societal                                   | ---                                                                                                                                                          | •Depression and anxiety (HADS)<br>•Quality of life (EQ-5D)                                        | £105,954 per QALY (caregiver)                                                                                                                | High                 |
| Søgaard et al. 2013 [74]          | Multicomponent       | Psychosocial intervention (DAISY) vs Usual Care<br>(Community-based: Primary care and memory clinics)                    | Denmark     | RCT<br>CUA<br>(36 months)                            | 330 / 330<br>(163 / 167)                                               | •Health and social care system<br>•Societal | •Quality of life (EQ-5D)<br>•Service utilisation<br>•Institutionalisation rates                                                                              | •Quality of life (EQ-5D)<br>•Time spent caregiving (RUD)                                          | Incremental cost per QALY <0 (patient+carer)<br>(intervention more costly and less effective)                                                | High                 |
| Eloniemi-Sulkava et al. 2009 [75] | Multicomponent       | Multicomponent support intervention for couples vs Usual Care<br>(Community-based)                                       | Finland     | RCT<br>CCA<br>(2 years)                              | 125 / 125<br>(63 / 62)                                                 | •Health and social care system              | •Comorbidity (CCI)<br>•Physical functioning (Barthel Index)<br>•Behavioral and psychological symptoms (NPI)<br>•Service utilisation<br>•Institutionalisation | •Caregiver burden (ZBI)                                                                           | €7,985 saved in healthcare services compared to the control group (not considering the intervention costs)                                   | Low                  |

769  
770  
771  
772  
773  
774  
775  
776

*Legend*

ADAS-Cog: Alzheimer's Disease Assessment Scale-Cognition subscale; ADLs: Activities of Daily living; AMI (E): Autobiographical memory interview (extended version); BADLS: Bristol Activities of Daily Living Scale; CCA: Cost consequence analysis; CCI: Charlson Comorbidity Index; CDR: Clinical Dementia Rating; CEA: Cost-effectiveness analysis; CES-D: Center for Epidemiologic Studies Depression Scale; CMAI = Cohen- Mansfield Agitation Inventory; CQLI: Caregiver Quality of Life Instrument; CSRI: Client Service Receipt Inventory CSSD: Cornell Scale for Depression in Dementia; CUA: Cost-utility analysis; DEMQOL Proxy: Dementia Quality of Life score reported by a carer; EQ-5D: EuroQol-5 Dimensions; GHQ-28: General Health Questionnaire - 28 item version; HADS: Hospital Anxiety and Depression Scale; IADLs: Instrumental Activities of Daily Living; MBI: Maslach Burnout Inventory; MINI: Mini International Neuropsychiatric Interview; NPI: Neuropsychiatric Inventory; QCPR: Quality of Caregiver–Patient Relationship; QoL-AD: Quality of Life-Alzheimer's Disease scale; RAID: Rating Anxiety in Dementia; RCT: Randomised controlled trial; RSS: Relatives' Stress Scale; RUD: Resource utilization in dementia-instrument; SCD: Sense of Competence in Dementia; SF-12: Short Form questionnaire-12 items; STAI: State-Trait Anxiety Inventory; STS: Staff Tactics Scale; ZBI: Zarit Burden Interview (self-reported questionnaire used to assess carer burden).

777 **Cognitive stimulation**

778 A reminiscence group therapy intervention for community-dwelling dementia patients and their caregivers in  
779 the UK was evaluated by Woods et al. [113]. The aim of the study was to assess, through a multicentre,  
780 pragmatic RCT, the effectiveness and cost-effectiveness of joint reminiscence groups for PwDs and their  
781 family caregivers as compared with usual care. Most participants were recruited through memory clinics and  
782 community mental health teams for older people. The analysed intervention consisted of joint reminiscence  
783 groups held weekly for 12 consecutive weeks, followed by monthly maintenance sessions for a further seven  
784 months. The primary outcome measures were self-reported QoL for the PwD (measured with QoL-AD and  
785 EQ-5D scores) and psychological distress for the carer (General Health Questionnaire - 28 item version [GHQ-  
786 28]). The study did not provide support for the cost-effectiveness of joint reminiscence groups for PwDs and  
787 their carers.

788

789 **Physical activity**

790 The Dementia and Physical Activity (DAPA) trial aimed at estimating the clinical effectiveness and cost-  
791 effectiveness at 12 months of a bespoke exercise programme, in addition to usual care, on the cognitive  
792 impairment (primary outcome), function, and QoL of people with mild to moderate dementia (MMD) and their  
793 carers' burden and QoL. Generic HRQoL was measured using the EQ-5D, three-level version, while dementia-  
794 related QoL was measured using the QoL-AD scale. Khan et al. [114] performed a cost-utility analysis of the  
795 intervention, which comprised both aerobic and resistance training programmes targeted at community-  
796 dwelling PwDs. The analysis found no impact on patient or caregiver outcomes and no evidence of cost-  
797 effectiveness, with a mean ICER of -£74,227 per QALY gained (i.e., the intervention was costlier and less  
798 effective than usual care). The probability that the DAPA was cost-effective was lower than 1% across the  
799 cost-effectiveness thresholds, and the incremental net monetary benefit ranged from -£2,601 to -£2,158 at  
800 cost-effectiveness thresholds between £15,000 and £30,000 per QALY. Therefore, the exercise intervention  
801 was dominated by usual practice in health economic terms.

802

803

## 804 **Indirect interventions**

805 Livingston et al. [61] performed a cost-effectiveness and cost-utility analysis of the MARQUE intervention  
806 targeted towards the staff of 20 nursing homes in the UK. MARQUE was an evidence-based manualised  
807 intervention delivered by supervised graduate psychologists to staff in six interactive training sessions on  
808 procedures to reduce agitation in residents with dementia. The authors considered both PwD and formal  
809 caregiver outcomes (the primary outcome was residents' agitation score at eight months, which was measured  
810 using the CMAI). They found that the intervention was not associated with a significant improvement in  
811 agitation or QoL, a reduction in possibly abusive behaviours, or a staff reduction in burnout or improvement  
812 in the sense of competence. Moreover, the prescription of antipsychotic drugs was not significantly different  
813 between the MARQUE group and the "treatment as usual" group. Their economic analysis showed that the  
814 intervention could be cost-effective, since the mean incremental cost per QALY gained of £14,064 was less  
815 than the NICE threshold of £20,000, but with a relatively low probability (62%). However, these results were  
816 driven by assumptions about the cost of the intervention, and the sensitivity analysis suggested that  
817 implementation on the basis of QoL should be interpreted with caution. The authors concluded that the  
818 implementation of MARQUE should not be recommended on the basis of differences in costs, QALYs, or  
819 cost-effectiveness and suggested that higher intensity interventions would be required for people with agitation  
820 in care homes.

821 Meeuwssen et al. [62] performed a cost-utility analysis on Dutch memory clinics in comparison with care  
822 provided by a general practitioner (GP) to community-dwelling patients newly diagnosed with MMD and their  
823 informal caregivers, with a 12-month follow-up. Compared to GPs' care, treatment provided by the memory  
824 clinics was on average €1,024 cheaper and showed a non-significant decrease of 0.025 QALYs (the ICER's  
825 denominator was the sum of the patient and caregiver QALYs). Therefore, they found no evidence that  
826 memory clinics were more cost-effective compared to general practitioners with regard to post-diagnosis  
827 treatment and coordination of care of patients with dementia in the first year after diagnosis.

828

## 829 **Interventions for carers**

830 Drummond et al. [64] performed a cost-utility analysis concurrently with a randomised trial comparing a  
831 Caregiver Support Programme (CSP) with existing conventional community nursing care for those caring for

832 elderly relatives at home. The intervention included nurse visits, respite care, and support group sessions. The  
833 differences in resource consumption were compared with changes in caregivers' QoL, as measured by the  
834 Caregiver Quality of Life Instrument (CQLI). They found an ICER of CAD\$20,000 per caregiver's QALY,  
835 but due to the statistically non-significant difference in outcome levels, evidence of cost-effectiveness was  
836 considered scarce.

837 Joling et al. [67] studied the cost-utility of regular family meetings to prevent depression and anxiety in  
838 informal caregivers of community-dwelling PwDs. Outcome measures included the QALYs of caregivers and  
839 patients and the incidence of depression and anxiety disorders in caregivers. The most important cost drivers  
840 involved informal care costs, day treatment, and admission costs of hospital and long-term care facilities for  
841 the patients. They observed no significant differences in total costs between both groups, including costs due  
842 to caregivers' work absenteeism and healthcare utilisation. They found that the maximum probability that the  
843 intervention was considered cost-effective in comparison with usual care reached 40% for the outcome QALY  
844 per patient-caregiver dyad and 60% for the caregivers' incidence of depression and/or anxiety disorders  
845 regardless of the willingness-to-pay. They concluded that the intervention was not cost-effective compared to  
846 usual care.

847 The Befriending and Costs of Caring trial (BECCA) aimed to establish whether another intervention aimed at  
848 caregivers, namely a structured befriending service, improved the QoL of carers of PwDs, and at what cost.  
849 Two back-to-back studies within the BECCA trial (Wilson et al. [123] together with Charlesworth et al. [127])  
850 analysed the intervention consisting of regular contact with a befriender facilitator to help caregivers improve  
851 their psychological wellbeing. Participants were family carers who were cohabiting with, or providing at least  
852 20 hours' care per week for, a community-dwelling relative with a primary progressive dementia. The point  
853 estimate ICER was £105,954 per QALY gained, with only a 42.2% probability of being below £30,000 per  
854 QALY gained (including the PwD's QALYs, the ICER was £28,848, with a 51.4% probability of being below  
855 £30,000). The analysis concluded that it was unlikely that befriending was a cost-effective intervention from  
856 the societal point of view.

857

858

## 859 **Multicomponent interventions**

860 Sjøgaard et al. [74] evaluated the effectiveness and cost-effectiveness at 36 months of an early psychosocial  
861 intervention aimed at patient-caregiver dyads that included different forms of counselling, education, and  
862 support (both individual- and group-based). The study was conducted alongside the randomised controlled  
863 multicentre trial of the Danish Alzheimer's Intervention Study (DAISY). QALYs were estimated separately  
864 for the patient and the caregiver (using the EQ-5D) before aggregation for the main analysis. The authors found  
865 no significant difference in both the measured costs and QALYs between the intervention and control groups,  
866 although a tendency was noted for psychosocial care leading to cost increases with informal care that was not  
867 outweighed by the tendency for cost savings with formal care. The probability of a composite psychosocial  
868 intervention being cost-effective from a societal perspective did not exceed 36% for any threshold value, and  
869 the alternative scenario analysis showed that the probability of cost-effectiveness increased over the range of  
870 the threshold values used if the cost perspective was restricted to formal health care. The authors recommended  
871 for practices in similar settings to provide follow-up with referrals to available local support programmes when  
872 needed and to restrict large, multifaceted intervention programmes to patients and caregivers with special needs  
873 until further evidence for cost-effectiveness emerges.

874 Eloniemi-Sulkava et al. [75] analysed the cost savings associated with a multicomponent intervention directed  
875 at community-dwelling patient-spouse dyads. Intervention couples were provided with a multicomponent  
876 intervention program with a family care coordinator, a geriatrician, support groups for caregivers, and  
877 individualised services. The considered outcomes were time from enrolment to institutionalisation of spouses  
878 with dementia and the use of services and service expenditures of couples. At 1.6 years, two times as many  
879 PwDs in the control group were in long-term institutional care as in the intervention group. Over a two-year  
880 time horizon (at the end of the intervention), the authors found a substantial equivalence in the  
881 institutionalisation risk between the control and the treated groups and a decrease in healthcare costs for the  
882 intervention group (the mean difference was €7,985 per capita per year) due to a reduction in the use of  
883 community services and expenditures. However, when the intervention costs were included, the differences  
884 between the groups were not significant.

885

## 886 **Discussion**

887

### 888 **Main findings**

889

890 This systematic review highlights the main evidence on the cost-effectiveness of SCIs for PwDs and their  
891 caregivers. The analysed studies were quite heterogeneous in quality and included relevant costs and outcome  
892 measures. Nevertheless, the higher quality studies may provide useful findings on the value for money of  
893 specific SCIs.

894 Ten studies provided evidence of high cost-effectiveness for seven SCIs (see Table 3): two cognitive  
895 stimulation and occupational programmes for community-dwelling PwDs [108, 116]; two indirect  
896 interventions (a group living service for PwDs [63] and a home care service [109]); two interventions, START  
897 and REACH II, aimed at caregivers of community-dwelling PwDs [66, 68, 117-118]; and one multicomponent  
898 intervention, WHELD, targeted towards patients in nursing homes [71-72]. Three of these SCIs were found  
899 dominant (i.e., less costly and more effective) over usual care, including the community-based occupational  
900 therapy intervention from memory clinics analysed by Graff et al. [108], the group living service considered  
901 by Wimo et al. [63], and the multicomponent WHELD intervention for resident PwDs [71-72]. START, the  
902 individual psychosocial therapy programme aimed at informal caregivers, was found to be more effective and  
903 costlier than usual care, but its ICER had a high probability of being within the acceptability threshold range  
904 of £20,000–30,000 per QALY currently used by the UK National Institute for Health and Care Excellence  
905 (NICE), which is also commonly used as an international benchmark [126]. For the other three SCIs—the  
906 cognitive stimulation programme for the patient-caregiver dyad TAP and two other community-based indirect  
907 interventions—the ICER was expressed as an incremental cost per unit of effectiveness: for the TAP  
908 programme [116] and the psychosocial programme for caregivers REACH II [68] the cost of an additional  
909 hour of caregiving time that can be saved by the intervention was well below the opportunity cost of caregiver's  
910 time; for the Dutch Geriatric Intervention Programme, consisting of regular nurse visits for community-  
911 dwelling PwDs [109], the mean incremental cost per successful treatment (prevented functional decline  
912 together with improved wellbeing of PwD) was quite low (about €3,500).



913 Two out of ten studies providing evidence of high cost-effectiveness—those related to the START programme  
914 aimed at informal caregivers [66] and community-based occupational therapy interventions from memory  
915 clinics [108]—were assessed as being of high quality according to the CHEC criteria [80]; seven other studies  
916 [63, 68, 71-72, 109, 117-118] received a medium-quality appraisal, while only one study [116] was classified  
917 as being of low quality.

918 Fourteen studies found evidence of moderate cost-effectiveness for 13 SCIs (see Table 4), including six  
919 cognitive stimulation and rehabilitation programmes for community-dwelling PwDs [110, 112], nursing home  
920 residents [119, 120], or PwDs in different settings [111, 124]; one light physical exercise programme [125];  
921 four indirect interventions, including personalised case management [58], DCM [59, 115], adult day care  
922 services [65], and DCM in a nursing home setting [121]; one intervention for caregivers [122]; and one  
923 community-based multicomponent intervention consisting of an integrated and personalised approach [73].

924 Nine studies found no or insufficient evidence of cost-effectiveness for nine SCIs (see Table 5), including one  
925 cognitive stimulation programme based on reminiscence group therapy [113]; one aerobic exercise and  
926 resistance training programme [114]; two indirect interventions, including training sessions on agitation for  
927 nursing home staff (MARQUE) [61] and memory clinics [62]; three interventions primarily targeted towards  
928 caregivers [64, 67, 123]; and two community-based multicomponent interventions [74, 75].

929 Our analysis partially confirms some results of previous systematic reviews. For example, the systematic  
930 reviews by Knapp et al. [27], Nickel et al. [30], and Clarkson et al. [31] suggested that tailored occupational  
931 therapy for community-dwelling patients and caregivers [108, 116] and cognitive and long-term psychological  
932 interventions directly delivered to PwDs [111, 124] may be either highly or moderately cost-effective with  
933 regard to specific outcomes, while joint reminiscence groups for PwDs and carers [113] were found unlikely  
934 to be cost-effective. Previous systematic reviews, including the analysis by Jones et al. [29], provided mixed  
935 evidence with regard to interventions aimed directly at informal caregivers, even though in more recent reviews  
936 [30, 31], the START intervention [66, 117-118] emerged as potentially cost-effective. Our analysis shows that  
937 some forms of psychosocial intervention for informal caregivers are highly cost-effective (e.g., the REACH II  
938 and START programmes [66, 68, 117-118]) or moderately cost-effective (e.g., the adult day care service  
939 analysed by Gaugler et al. [122]), while other similar interventions have little or no cost-effectiveness (e.g.,  
940 family meetings and befriending [67, 123]).

941 In contrast to other reviews, we found a high value for money of structured multicomponent interventions  
942 targeted towards patients in nursing homes, which have the potential to draw benefits from the most cost-  
943 effective one-dimensional programmes. This was the case for the UK-based Improving Wellbeing and Health  
944 for People with Dementia (WHELD) programme for patients in nursing homes, which combines person-  
945 centred care, physical exercise, psychosocial activities, training for care staff, and the development of a system  
946 for triggering the appropriate review of antipsychotic medications for PwDs [71,72]. On the contrary, other  
947 multicomponent interventions for community-dwelling patients and caregivers were assessed as moderately  
948 cost-effective [73] or without any significant cost-effectiveness [74, 75]. We also found evidence of moderate  
949 cost-effectiveness of specific cognitive stimulation programmes for institutionalised PwDs (in particular, the  
950 learning therapy programme analysed by Sado et al. [119]) or for community-dwelling PwDs and their carers  
951 (specifically, the tailored cognitive rehabilitation programme investigated by Clare et al. within the GREAT  
952 trial [110]). In contrast to previous reviews [30, 31], we were not able to find clear evidence of value for money  
953 for exercise programmes. For example, the individually tailored exercise intervention considered by D’Amico  
954 et al. [125] significantly improved patients’ NPI scores but, owing to its high costs, it did not appear cost-  
955 effective when considering QALY gains; the DAPA, another exercise programme that was studied by Khan  
956 et al. [114], was dominated by usual practice in terms of cost-effectiveness. Similarly, several indirect  
957 interventions centred around organisational and environmental changes showed either moderate [58-59, 65,  
958 121] or no [61-62] cost-effectiveness.

959

## 960 **Methodological and operational challenges for the cost-effectiveness of** 961 **supportive care interventions**

962

963 From this review, we can identify a number of critical issues concerning both the methodology of economic  
964 evaluations and actual barriers to achieving better value for money of SCIs for dementia care.

965 A first issue is the high methodological heterogeneity of the available studies in terms of quality, populations  
966 studied (regarding severity, comorbidity, and care settings), and the inclusion of relevant costs and outcome  
967 measures, which make it difficult to generalise their results. A frequent limitation of the analysed studies is the

968 short time frame adopted for measuring most outcomes and costs. This is a result of the fact that most studies  
969 were trial-based evaluations. Additional research would be required to investigate the SCIs' effects over longer  
970 time horizons. For example, using a decision analysis modelling strategy to compare the costs and effectiveness  
971 of the interventions in the longer term could be an option to explore.

972 A second methodological issue concerns the instruments used to measure the outcomes of SCIs in terms of  
973 QoL for PwDs and to derive QALYs in cost-utility analyses. The reviewed studies applied two types of  
974 instruments: a) generic instruments to assess HRQoL, such as the EQ-5D [58, 61-62, 73-74, 111, 113-114,  
975 119, 123], the IWB scale [63, 65], the SF-12 [59, 67], and the WHOQoL-BREF [110]; and b) dementia-specific  
976 instruments to measure the QoL of PwDs, such as the QoL-AD [111-114, 123-124], the DEMQOL [110-111],  
977 and the DEMQOL-Proxy [61, 71-72, 111-112, 125]. The generic and dementia-specific QoL measures  
978 generally did not provide consistent cost-effectiveness findings. In particular, generic measures may not  
979 capture all relevant aspects associated with PwDs' experiences, even though instruments such as the SF-12 or  
980 EQ-5D have been shown to be suitable for HRQoL self-reporting by PwDs in mild and moderate stages [59,  
981 62, 111, 113-114, 123].

982 Since the assessment of self-report HRQoL and dementia-related QoL in PwDs is often characterised by recall  
983 bias and missing values, many studies opted for using carer-proxy reports of PwD QoL [58, 61, 67, 71-74,  
984 111-114, 117,125]; another option was to convert data from clinical/health measures into QoL estimates  
985 according to the views of expert external observers [63, 65]. However, there are important differences between  
986 self-report and carer-proxy (or expert-proxy) reports [30,128-129]. For this reason, it may be useful to use both  
987 self and proxy ratings in the economic analyses of SCIs. Actually, some analysed studies [111-114] provided  
988 both measures of PwDs' QoL, thus confirming that self-rated and proxy QoL measures often have low levels  
989 of overall agreement and therefore cannot be assumed to substitute for each other. Furthermore, because the  
990 outcomes for caregivers and PwDs are typically interlinked, it is important to jointly assess the QoL of patient-  
991 caregiver dyads in order to take into account the type of caregiving relationship, which is an area of outcome  
992 assessment that has not yet been adequately developed. Four studies considered in our review assessed the  
993 QoL of patient-caregiver dyads [58, 62, 67, 74] by calculating the combined QALY scores through the simple  
994 summing of the QALYs for the PwD and the caregiver.

995 Another methodological issue concerns the identification and evaluation of the costs of SCIs. In this respect,  
996 18 out of 33 of the studies under review adopted a narrow perspective, looking only at the health and social  
997 care system and overlooking the opportunity costs of informal caregiver inputs and the impacts of caring on  
998 their own health and wellbeing. Given the pivotal roles of family and other carers in dementia care, several  
999 authors [27, 30] recommend that economic evaluations of SCIs for PwDs take on a societal perspective,  
1000 including all relevant costs irrespective of where they occur and where they are funded.

1001 Regarding the operational challenges surrounding the adoption of cost-effective SCIs, a first issue to consider  
1002 is that pure cost-effectiveness analyses measure the ICER as an incremental cost per one-point difference in  
1003 specific outcome measures, such as the MMSE [111, 124], NPI [125], CMAI [72, 120], or carer's HADS  
1004 scores [66, 117-118]. However, in contrast to a cost-utility analysis, where the ICER is expressed in terms of  
1005 the incremental cost per QALY gained and the acceptability threshold range of £20,000–30,000 per QALY is  
1006 frequently used, no established cost-effectiveness benchmark exists for such outcome changes. Therefore, it is  
1007 quite difficult to ascertain whether a particular SCI represents good value for money to the health and social  
1008 care system, because we do not know the decision maker's willingness-to-pay for a one-unit reduction in the  
1009 MMSE NPI, CMAI, or HADS scores.

1010 Another operational challenge underlined by Knapp et al. [27] is that the cost-effectiveness of SCIs for PwDs  
1011 depends crucially on the degree of integration between health and social care services, which are often  
1012 delivered by different providers and funded from different budgets. It is therefore crucial to improve  
1013 coordination between these services in order to increase the efficiency and effectiveness of interventions for  
1014 PwDs.

1015

## 1016 **Limitations**

1017

1018 The high heterogeneity of the analysed studies with regard to the study populations considered, relevant costs  
1019 and outcome measures, time horizons, and perspectives of the analyses made it impossible to perform a meta-  
1020 analysis of the studies; therefore, we used a narrative summary approach.

1021 Even though we conducted a comprehensive literature search based on extensive search terms, some papers  
1022 meeting the criteria for inclusion might not have been identified. Furthermore, our systematic review may be  
1023 subject to a language bias, as only publications in English or those with an abstract in English were included.  
1024 Some studies reviewed [63-65] were published years before the development of guidelines for assessing the  
1025 methodological quality of health economics evaluations, such as the CHEC criteria [80]; therefore, their quality  
1026 assessment may have been compromised. In any event, we decided to include these studies in the review  
1027 because they evaluated forms of home support not considered by more recent studies, thereby allowing us to  
1028 cover a wider range of SCIs for PwDs.

1029

## 1030 **Future research**

1031

1032 Our systematic review has highlighted the potential cost-effectiveness of multicomponent SCIs targeted  
1033 towards patients in nursing homes (e.g., the WHELD programme [71-72]) that combine several interventions  
1034 (person-centred care, physical exercise, psychosocial activities, behaviour management and training for care  
1035 staff, the development of multi-disciplinary teams) with positive effects in terms of a decrease in challenging  
1036 behaviour and the prescription of psychoactive drugs. Other studies [73-75] provided mixed evidence with  
1037 regard to the value for money of community-based structured multicomponent interventions targeted at  
1038 persons with MMD. Future research should therefore examine the cost-effectiveness of structured  
1039 multicomponent interventions in different care settings and consider subgroups of PwDs at different disease  
1040 stages. Furthermore, it is important to assess the impact on cost-effectiveness of the different components of  
1041 multi-disciplinary interventions by focusing on the assessment of the roles of care coordination and case  
1042 management. Eliciting the contribution of each component to the SCIs' costs and outcomes would be important  
1043 in terms of policy by highlighting how and why specific interventions may work to benefit PwDs and/or their  
1044 caregivers.

1045 Similar to other systematic reviews [29-31], we found mixed evidence with regard to SCIs targeted towards  
1046 informal caregivers. Specifically, some forms of psychosocial intervention for informal caregivers are highly  
1047 cost-effective [66, 68, 117-118] or moderately cost-effective [122], while others have shown little or no cost-

1048 effectiveness [67, 123]. As such, further investigation is needed to ascertain the real effects of interventions  
1049 aimed directly at carers.

1050

## 1051 **Conclusion**

1052

1053 To assess the current state of research on the cost-effectiveness of SCIs for dementia, we performed a  
1054 systematic review of the economic evidence, which is still scarce despite the several calls for action that have  
1055 been made in the past few years [12, 27, 29, 130]. We reviewed 33 studies that analysed 29 SCIs located at  
1056 different stages of the care pathway for dementia that were generally directed at patient-caregiver dyads. Most  
1057 interventions (23 out of 29) were implemented in European countries with comparable underlying health and  
1058 social care systems.

1059 We found that the most promising SCIs in terms of cost-effectiveness were some multicomponent  
1060 interventions targeted towards nursing home residents, such as the WHELD programme [71-72], together with  
1061 some forms of tailored occupational therapy [108, 116] and home care support services [63, 114] for  
1062 community-dwelling PwDs. Our analysis has also shown that some forms of psychosocial intervention for  
1063 informal caregivers of community-dwelling PwDs, such as the REACH II and START programmes [66, 68,  
1064 117-118], were highly cost-effective. These results suggest the importance of policies promoting the adoption  
1065 of effective supportive care interventions to integrate or substitute the use of medications to increase the  
1066 economic sustainability of dementia care.

1067 Further research is required to establish the cost-effectiveness of structured multicomponent interventions in  
1068 different care settings by considering subgroups of PwDs at different disease stages and assessing the impact  
1069 of each component of the intervention. Moreover, since the evidence on the cost-effectiveness of SCIs targeted  
1070 towards informal caregivers is mixed, further investigation is needed to ascertain the real effects of these  
1071 interventions on both the PwD and his/her carer.

## 1072 **Supporting Information**

1073 **Checklist S1.** PRISMA Checklist

1074 **S1 File.** Electronic Search Strategy

1075 **S1 Table.** Assessment of methodological quality of the studies with evidence of high cost-effectiveness of  
1076 SCIs

1077 **S2 Table.** Assessment of methodological quality of the studies with evidence of moderate cost-effectiveness  
1078 of SCIs

1079 **S3 Table.** Assessment of methodological quality of the studies without evidence of cost-effectiveness of SCIs

1080

## 1081 **Acknowledgments**

1082 We thank Francesco Miele and Federico Neresini for their useful comments. This study has been carried out  
1083 within the research project “Supportive care for elderly people with severe cognitive impairment” sponsored  
1084 by the Civitas Vitae Research Centre at Fondazione OIC, Padova, Italy.

1085

1086

## 1087 **References**

1088

1089 1. Nichols E, Szeke CEI, Vollset SE, Abbasi N, Abd-Allah F, Abdela J, et al. Global, regional, and  
1090 national burden of Alzheimer’s disease and other dementias, 1990–2016: a systematic analysis for the Global  
1091 Burden of Disease Study 2016. *The Lancet Neurology* [Internet]. 2019 Jan; 18(1):88–106. doi:  
1092 10.1016/S1474-4422(18)30403-4

1093 2. Livingston G, Sommerlad A, Orgeta V, Costafreda SG, Huntley J, Ames D, et al. Dementia prevention,  
1094 intervention, and care. *The Lancet* [Internet]. 2017 Dec; 390(10113):2673–734. doi: 10.1016/S0140-  
1095 6736(17)31363-6

- 1096 3. Samia LW, Aboueissa A-M, Halloran J, Hepburn K. The Maine Savvy Caregiver Project: Translating  
1097 an Evidence-Based Dementia Family Caregiver Program Within the RE-AIM Framework. *Journal of*  
1098 *Gerontological Social Work* [Internet]. 2014 May 15; 57(6–7):640–61. doi: 10.1080/01634372.2013.859201
- 1099 4. Black BE, Johnston D, Reuland M, Lyketsos C, Samus QM. P1-549: Unmet Needs of Community-  
1100 Residing Persons with Dementia. *Alzheimer’s & Dementia* [Internet]. 2006 Jul 1; 14(7S\_Part\_9):P543–4.  
1101 doi: 10.1016/j.jalz.2018.06.560
- 1102 5. Zhu CW, Scarmeas N, Ornstein K, Albert M, Brandt J, Blacker D, et al. Health-care use and cost in  
1103 dementia caregivers: Longitudinal results from the Predictors Caregiver Study. *Alzheimer’s & Dementia*  
1104 [Internet]. 2014 Mar 17; 11(4):444–54. doi: 10.1016/j.jalz.2013.12.018
- 1105 6. Roth DL, Fredman L, Haley WE. Informal Caregiving and Its Impact on Health: A Reappraisal From  
1106 Population-Based Studies. *The Gerontologist* [Internet]. 2015 Feb 18; 55(2):309–19. doi:  
1107 10.1093/geront/gnu177
- 1108 7. 2014 Alzheimer’s disease facts and figures. *Alzheimer’s & Dementia* [Internet]. 2014 Mar; 10(2):e47–  
1109 92. doi: 10.1016/j.jalz.2014.02.001
- 1110 8. Weller J, Budson A. Current understanding of Alzheimer’s disease diagnosis and treatment. *F1000Res*  
1111 [Internet]. 2018 Jul 31; 7:1161. doi: 10.12688/f1000research.14506.1
- 1112 9. Grossberg GT, Tong G, Burke AD, Tariot PN. Present Algorithms and Future Treatments for  
1113 Alzheimer’s Disease. Fink A, editor. *JAD* [Internet]. 2019 Feb 19; 67(4):1157–71. doi: 10.3233/JAD-180903
- 1114 10. Jobke B, McBride T, Nevin L, Peiperl L, Ross A, Stone C, et al. Setbacks in Alzheimer research  
1115 demand new strategies, not surrender. *PLoS Med* [Internet]. 2018 Feb 27; 15(2):e1002518. doi:  
1116 10.1371/journal.pmed.1002518
- 1117 11. Cummings J, Lee G, Ritter A, Sabbagh M, Zhong K. Alzheimer’s disease drug development pipeline:  
1118 2019. *Alzheimer’s & Dementia: Translational Research & Clinical Interventions* [Internet]. 2019  
1119 Jan; 5(1):272–93. doi: 10.1016/j.trci.2019.05.008
- 1120 12. Banerjee S. The use of antipsychotic medication for people with dementia: Time for action. Report.  
1121 UK Department of Health; 2009 Nov.
- 1122 13. Yan J. FDA Extends Black-Box Warning to All Antipsychotics. *PN* [Internet]. 2008 Jul 18; 43(14):1–  
1123 27. doi: 10.1176/pn.43.14.0001



- 1124 14. Alzheimer's Disease International. Dementia: a public health priority. WHO, London; 2012.
- 1125 15. Carter EA, Purvis L. Reducing Potential Overuse of Dementia Drugs Could Lead to Considerable  
1126 Savings. AARP Public Policy Institute. 2018 Aug; 1-6.
- 1127 16. Hughes J. Models of dementia care: Person-centered, palliative and supportive. Alzheimer's Australia;  
1128 2013.
- 1129 17. Hughes J, Lloyd-Williams M, Sachs G, editors. Supportive care for the person with dementia  
1130 [Internet]. Oxford University Press; 2009. doi: 10.1093/acprof:oso/9780199554133.001.0001
- 1131 18. Oyebode JR, Parveen S. Psychosocial interventions for people with dementia: An overview and  
1132 commentary on recent developments. Dementia [Internet]. 2016 Jul 4; 18(1):8–35. doi:  
1133 10.1177/1471301216656096
- 1134 19. Zucchella C, Sinforiani E, Tamburin S, Federico A, Mantovani E, Bernini S, et al. The  
1135 Multidisciplinary Approach to Alzheimer's Disease and Dementia. A Narrative Review of Non-  
1136 Pharmacological Treatment. Front Neurol [Internet]. 2018 Dec 13; 9. doi: 10.3389/fneur.2018.01058
- 1137 20. Carrieri D, Peccatori FA, Boniolo G. Supporting Supportive Care in Cancer: The ethical importance  
1138 of promoting a holistic conception of quality of life. Critical Reviews in Oncology/Hematology [Internet].  
1139 2018 Nov; 131:90–5. doi: 10.1016/j.critrevonc.2018.09.002
- 1140 21. Boland J, Johnson MJ. End-of-life care for non-cancer patients. BMJ Support Palliat Care [Internet].  
1141 2013 Mar; 3(1):2–3. doi: 10.1136/bmjspcare-2013-000446
- 1142 22. The Lancet Neurology. Antipsychotic drugs for dementia: a balancing act. The Lancet Neurology  
1143 [Internet]. 2009 Feb; 8(2):125. doi: 10.1016/s1474-4422(09)70001-8
- 1144 23. Miele F, Neresini F, Boniolo G, Paccagnella O. Supportive care for older people with dementia: socio-  
1145 organisational implications. Ageing and Society [Internet]. 2020 Jul 23; 1–33. doi:  
1146 10.1017/S0144686X20000938
- 1147 24. Ward-Griffin C. Supportive care to family caregivers is not supportive enough: moving towards an  
1148 equitable approach to dementia home care. Neurodegenerative Disease Management [Internet]. 2012 Apr;  
1149 2(2):173–81. doi: 10.2217/nmt.11.83
- 1150 25. Addressing Dementia [Internet]. OECD Health Policy Studies. OECD; 2015. doi:  
1151 10.1787/9789264231726-en

- 1152 26. Gauthier S, Cummings J, Ballard C, Brodaty H, Grossberg G, Robert P, et al. Management of  
1153 behavioral problems in Alzheimer's disease. *Int Psychogeriatr* [Internet]. 2010 Jan 25; 22(3):346–72. doi:  
1154 10.1017/s1041610209991505
- 1155 27. Knapp M, Iemmi V, Romeo R. Dementia care costs and outcomes: a systematic review. *Int J Geriatr*  
1156 *Psychiatry* [Internet]. 2012 Aug 12; 28(6):551–61. doi: 10.1002/gps.3864
- 1157 28. Livingston G, Kelly L, Lewis-Holmes E, Baio G, Morris S, Patel N, et al. A systematic review of the  
1158 clinical effectiveness and cost-effectiveness of sensory, psychological and behavioural interventions for  
1159 managing agitation in older adults with dementia. *Health Technology Assessment* [Internet]. 2014 Jun;  
1160 18(39). doi: 10.3310/hta18390
- 1161 29. Jones C, Edwards RT, Hounsome B. A systematic review of the cost-effectiveness of interventions for  
1162 supporting informal caregivers of people with dementia residing in the community. *Int Psychogeriatr*  
1163 [Internet]. 2011 Aug 4; 24(1):6–18. doi: 10.1017/S1041610211001207
- 1164 30. Nickel F, Barth J, Kolominsky-Rabas PL. Health economic evaluations of non-pharmacological  
1165 interventions for persons with dementia and their informal caregivers: a systematic review. *BMC Geriatr*  
1166 [Internet]. 2018 Mar 9; 18(1). doi: 10.1186/s12877-018-0751-1
- 1167 31. Clarkson P, Davies L, Jasper R, Loynes N, Challis D. A Systematic Review of the Economic Evidence  
1168 for Home Support Interventions in Dementia. *Value in Health* [Internet]. 2017 Sep; 20(8):1198–209. doi:  
1169 10.1016/j.jval.2017.04.004
- 1170 32. Wimo A, Guerchet M, Ali G-C, Wu Y-T, Prina AM, Winblad B, et al. The worldwide costs of  
1171 dementia 2015 and comparisons with 2010. *Alzheimer's & Dementia* [Internet]. 2016 Aug 29; 13(1):1–7.  
1172 doi: 10.1016/j.jalz.2016.07.150
- 1173 33. El-Hayek YH, Wiley RE, Khoury CP, Daya RP, Ballard C, Evans AR, et al. Tip of the Iceberg:  
1174 Assessing the Global Socioeconomic Costs of Alzheimer's Disease and Related Dementias and Strategic  
1175 Implications for Stakeholders. *JAD* [Internet]. 2019 Jul 23; 70(2):323–41. doi: 10.3233/JAD-190426
- 1176 34. Kingston A, Wohland P, Wittenberg R, Robinson L, Brayne C, Matthews FE, et al. Is late-life  
1177 dependency increasing or not? A comparison of the Cognitive Function and Ageing Studies (CFAS). *The*  
1178 *Lancet* [Internet]. 2017 Oct; 390(10103):1676–84. doi: 10.1016/s0140-6736(17)31575-1

- 1179 35. Lewis FI, Torgerson PR. The current and future burden of late-onset dementia in the United Kingdom:  
1180 Estimates and interventions. *Alzheimer's & Dementia* [Internet]. 2016 May 6; 13(1):38–44. doi:  
1181 10.1016/j.jalz.2016.03.013
- 1182 36. Versijpt J. Effectiveness and Cost-Effectiveness of the Pharmacological Treatment of Alzheimer's  
1183 Disease and Vascular Dementia. *JAD* [Internet]. 2014 Sep 2; 42(s3):S19–25. doi: 10.3233/JAD-132639
- 1184 37. Knapp M, Park A, Burns A. Medications for treating people with dementia: summary of evidence on  
1185 cost-effectiveness [v4]. PSSRU, London School of Economics and Political Science; 2017 Jul 23.
- 1186 38. Ballard C, Hanney ML, Theodoulou M, Douglas S, McShane R, Kossakowski K, et al. The dementia  
1187 antipsychotic withdrawal trial (DART-AD): long-term follow-up of a randomised placebo-controlled trial.  
1188 *The Lancet Neurology* [Internet]. 2009 Feb; 8(2):151–7. doi: 10.1016/s1474-4422(08)70295-3
- 1189 39. Cammisuli DM, Danti S, Bosinelli F, Cipriani G. Non-pharmacological interventions for people with  
1190 Alzheimer's Disease: A critical review of the scientific literature from the last ten years. *European Geriatric*  
1191 *Medicine* [Internet]. 2016 Feb; 7(1):57–64. doi: 10.1016/j.eurger.2016.01.002
- 1192 40. D'Onofrio G, Sancarlo D, Seripa D, Ricciardi F, Giuliani F, Panza F, et al. Non-Pharmacological  
1193 Approaches in the Treatment of Dementia. In: *Update on Dementia* [Internet]. InTech; 2016. doi:  
1194 10.5772/64232
- 1195 41. Prince M, Bryce R, Ferri C. *World Alzheimer Report 2011: The benefits of early diagnosis and*  
1196 *intervention*. Alzheimer's Disease International, London; 2011.
- 1197 42. Breuil V, De Rotrou J, Forette F, Tortrat D, Ganansia-Ganem A, Frambourt A, et al. Cognitive  
1198 stimulation of patients with dementia: Preliminary results. *Int J Geriat Psychiatry* [Internet]. 1994 Mar;  
1199 9(3):211–7. doi: 10.1002/gps.930090306
- 1200 43. Spector A, Thorgrimsen L, Woods B, Royan L, Davies S, Butterworth M, et al. Efficacy of an  
1201 evidence-based cognitive stimulation therapy programme for people with dementia. *Br J Psychiatry*  
1202 [Internet]. 2003 Sep; 183(3):248–54. doi: 10.1192/bjp.183.3.248
- 1203 44. Pimouguet C, Sitta R, Wittwer J, Hayes N, Petit-Monéger A, Dartigues J-F, et al. Maintenance of  
1204 occupational therapy (OT) for dementia: protocol of a multi-center, randomized controlled and pragmatic  
1205 trial. *BMC Geriatr* [Internet]. 2019 Feb 6; 19(1). doi: 10.1186/s12877-019-1046-x

- 1206 45. Zanetti O. Predictors of cognitive improvement after reality orientation in Alzheimer's disease. *Age*  
1207 and Ageing [Internet]. 2002 May 1; 31(3):193–6. doi: 10.1093/ageing/31.3.193
- 1208 46. Onder G, Zanetti O, Giacobini E, Frisoni GB, Bartorelli L, Carbone G, et al. Reality orientation therapy  
1209 combined with cholinesterase inhibitors in Alzheimer's disease: randomised controlled trial. *Br J Psychiatry*  
1210 [Internet]. 2005 Nov; 187(5):450–5. doi: 10.1192/bjp.187.5.450
- 1211 47. Woods B, O'Philbin L, Farrell EM, Spector AE, Orrell M. Reminiscence therapy for dementia.  
1212 *Cochrane Database of Systematic Reviews* [Internet]. 2018 Mar 1; doi: 10.1002/14651858.cd001120.pub3
- 1213 48. Kawashima R, Okita K, Yamazaki R, Tajima N, Yoshida H, Taira M, et al. Reading Aloud and  
1214 Arithmetic Calculation Improve Frontal Function of People With Dementia. *The Journals of Gerontology*  
1215 *Series A: Biological Sciences and Medical Sciences* [Internet]. 2005 Mar 1; 60(3):380–4. doi:  
1216 10.1093/gerona/60.3.380
- 1217 49. Killick J, Allan K. The arts in dementia care: tapping a rich resource. *J Dement Care*. 1999; 7:35–38.
- 1218 50. Raglio A, Filippi S, Leonardelli L, Trentini E, Bellandi D. The Global Music Approach to Dementia  
1219 (GMA-D): evidences from a case report. *Aging Clin Exp Res* [Internet]. 2018 Feb 20; 30(12):1533–6. doi:  
1220 10.1007/s40520-018-0919-8
- 1221 51. Galbraith B, Larkin H, Moorhouse A, Oomen T. Intergenerational Programs for Persons With  
1222 Dementia: A Scoping Review. *Journal of Gerontological Social Work* [Internet]. 2015 Mar 6; 58(4):357–78.  
1223 doi: 10.1080/01634372.2015.1008166
- 1224 52. Mitchell G. Use of doll therapy for people with dementia: an overview. *Nursing Older People*  
1225 [Internet]. 2014 Apr 30; 26(4):24–6. doi: 10.7748/nop2014.04.26.4.24.e568
- 1226 53. Zafra-Tanaka JH, Pacheco-Barrios K, Tellez WA, Taype-Rondan A. Effects of dog-assisted therapy  
1227 in adults with dementia: a systematic review and meta-analysis. *BMC Psychiatry* [Internet]. 2019 Jan 24;  
1228 19(1). doi:.1186/s12888-018-2009-z
- 1229 54. Douglas S, James I, Ballard C. Non-pharmacological interventions in dementia. *Adv psychiatr treat*  
1230 [Internet]. 2004 May; 10(3):171–7. doi: 10.1192/apt.10.3.171
- 1231 55. King AC. Moderate-Intensity Exercise and Self-rated Quality of Sleep in Older Adults. *JAMA*  
1232 [Internet]. 1997 Jan 1; 277(1):32. doi: <http://dx.doi.org/10.1001/jama.1997.03540250040029>

- 1233 56. Young A, Dinan S. ABC of Sports Medicine: Fitness for older people. *BMJ* [Internet]. 1994 Jul 30;  
1234 309(6950):331–4. doi: 10.1136/bmj.309.6950.331
- 1235 57. Somme D, Trouve H, Dramé M, Gagnon D, Couturier Y, Saint-Jean O. Analysis of case management  
1236 programs for patients with dementia: A systematic review. *Alzheimer's & Dementia* [Internet]. 2012 Jan 30;  
1237 8(5):426–36. doi: 10.1016/j.jalz.2011.06.004
- 1238 58. MacNeil Vroomen J, Bosmans JE, Eekhout I, Joling KJ, van Mierlo LD, Meiland FJM, et al. The  
1239 Cost-Effectiveness of Two Forms of Case Management Compared to a Control Group for Persons with  
1240 Dementia and Their Informal Caregivers from a Societal Perspective. Mihalopoulos C, editor. *PLoS ONE*  
1241 [Internet]. 2016 Sep 21; 11(9):e0160908. doi: 10.1371/journal.pone.0160908
- 1242 59. Michalowsky B, Xie F, Eichler T, Hertel J, Kaczynski A, Kilimann I, et al. Cost-effectiveness of a  
1243 collaborative dementia care management-Results of a cluster-randomized controlled trial. *Alzheimer's &*  
1244 *Dementia* [Internet]. 2019 Aug 10; 15(10):1296–308. doi: 10.1016/j.jalz.2019.05.008
- 1245 60. Williams J, Rees J. The use of 'dementia care mapping' as a method of evaluating care received by  
1246 patients with dementia – an initiative to initiative to improve quality of life. *Journal of Advanced Nursing*  
1247 [Internet]. 1997 Feb; 25(2):316–23. doi: 10.1046/j.1365-2648.1997.1997025316.x
- 1248 61. Livingston G, Barber J, Marston L, Stringer A, Panca M, Hunter R, et al. Clinical and cost-  
1249 effectiveness of the Managing Agitation and Raising Quality of Life (MARQUE) intervention for agitation  
1250 in people with dementia in care homes: a single-blind, cluster-randomised controlled trial. *The Lancet*  
1251 *Psychiatry* [Internet]. 2019 Apr; 6(4):293–304. doi: 10.1016/s2215-0366(19)30045-8
- 1252 62. Meeuwssen E, Melis R, van der Aa G, Golüke-Willemse G, de Leest B, van Raak F, et al. Cost-  
1253 Effectiveness of One Year Dementia Follow-Up Care by Memory Clinics or General Practitioners: Economic  
1254 Evaluation of a Randomised Controlled Trial. Meara JG, editor. *PLoS ONE* [Internet]. 2013 Nov 25;  
1255 8(11):e79797. doi: 10.1371/journal.pone.0079797
- 1256 63. Wimo A, Mattson B, Krakau I, Eriksson T, Nelvig A, Karlsson G. Cost-Utility Analysis of Group  
1257 Living in Dementia Care. *Int J Technol Assess Health Care* [Internet]. 1995; 11(1):49–65. doi:  
1258 10.1017/s0266462300005250

- 1259 64. Drummond MF, Mohide EA, Tew M, Streiner DL, Pringle DM, Gilbert JR. Economic Evaluation of  
1260 A Support Program for Caregivers of Demented Elderly. *Int J Technol Assess Health Care* [Internet]. 1991;  
1261 7(2):209–19. doi: 10.1017/s0266462300005109
- 1262 65. Wimo A, Mattsson B, Krakau I, Eriksson T, Nelvig A. Cost-effectiveness analysis of day care for  
1263 patients with dementia disorders. *Health Econ* [Internet]. 1994 Nov; 3(6):395–404. doi:  
1264 10.1002/hec.4730030607
- 1265 66. Knapp M, King D, Romeo R, Schehl B, Barber J, Griffin M, et al. Cost effectiveness of a manual  
1266 based coping strategy programme in promoting the mental health of family carers of people with dementia  
1267 (the START (STrAtegies for RelaTives) study): a pragmatic randomised controlled trial. *BMJ* [Internet].  
1268 2013 Oct 25; 347(oct25 2):f6342–f6342. doi: 10.1136/bmj.f6342
- 1269 67. Joling KJ, Bosmans JE, van Marwijk HW, van der Horst HE, Scheltens P, Vroomen JL, et al. The  
1270 cost-effectiveness of a family meetings intervention to prevent depression and anxiety in family caregivers  
1271 of patients with dementia: a randomized trial. *Trials* [Internet]. 2013; 14(1):305. doi: 10.1186/1745-6215-14-  
1272 305
- 1273 68. Nichols LO, Chang C, Lummus A, Burns R, Martindale-Adams J, Graney MJ, et al. The Cost-  
1274 Effectiveness of a Behavior Intervention with Caregivers of Patients with Alzheimer’s Disease. *Journal of*  
1275 *the American Geriatrics Society* [Internet]. 2008 Mar; 56(3):413–20. doi: 10.1111/j.1532-5415.2007.01569.x
- 1276 69. Miles L, McCausland BMS, Patel HP, Amin J, Osman-Hicks VC. A systematic review of the provision  
1277 and efficacy of patient and carer information and support (PCIS) interventions for patients with dementia and  
1278 their informal carers. *Aging Clin Exp Res* [Internet]. 2019 Dec 5; 32(12):2439–48. doi: 10.1007/s40520-019-  
1279 01428-8
- 1280 70. Merlo P, Devita M, Mandelli A, Rusconi ML, Taddeucci R, Terzi A, et al. Alzheimer Café: an  
1281 approach focused on Alzheimer’s patients but with remarkable values on the quality of life of their caregivers.  
1282 *Aging Clin Exp Res* [Internet]. 2017 Oct 11; 30(7):767–74. doi: 10.1007/s40520-017-0844-2
- 1283 71. Ballard C, Corbett A, Orrell M, Williams G, Moniz-Cook E, Romeo R, et al. Impact of person-centred  
1284 care training and person-centred activities on quality of life, agitation, and antipsychotic use in people with  
1285 dementia living in nursing homes: A cluster-randomised controlled trial. Miller BL, editor. *PLoS Med*  
1286 [Internet]. 2018 Feb 6; 15(2):e1002500. doi: 10.1371/journal.pmed.1002500

- 1287 72. Romeo R, Zala D, Knapp M, Orrell M, Fossey J, Ballard C. Improving the quality of life of care home  
1288 residents with dementia: Cost-effectiveness of an optimized intervention for residents with clinically  
1289 significant agitation in dementia. *Alzheimer's & Dementia* [Internet]. 2018 Nov 20; 15(2):282–91. doi:  
1290 10.1016/j.jalz.2018.08.010
- 1291 73. Wolfs CAG, Dirksen CD, Severens JL, Kessels A, Verkaaik M, Verhey FRJ. De kosten en opbrengsten  
1292 van een geïntegreerde aanpak bij dementie. *Tijdschrift voor Psychiatrie*. 2011; 53:657-665.
- 1293 74. Søggaard R, Sørensen J, Waldorff FB, Eckermann A, Buss DV, Phung KTT, et al. Early psychosocial  
1294 intervention in Alzheimer's disease: cost utility evaluation alongside the Danish Alzheimer's Intervention  
1295 Study (DAISY). *BMJ Open* [Internet]. 2014 Jan; 4(1):e004105. doi: 10.1136/bmjopen-2013-004105
- 1296 75. Eloniemi-Sulkava U, Saarenheimo M, Laakkonen M-L, Pietilä M, Savikko N, Kautiainen H, et al.  
1297 Family Care as Collaboration: Effectiveness of a Multicomponent Support Program for Elderly Couples with  
1298 Dementia. Randomized Controlled Intervention Study. *Journal of the American Geriatrics Society* [Internet].  
1299 2009 Dec; 57(12):2200–8. doi: 10.1111/j.1532-5415.2009.02564.x
- 1300 76. Wright J, Foster A, Cooper C, Sprange K, Walters S, Berry K, et al. Study protocol for a randomised  
1301 controlled trial assessing the clinical and cost-effectiveness of the Journeying through Dementia (JtD)  
1302 intervention compared to usual care. *BMJ Open* [Internet]. 2019 Sep; 9(9):e029207. doi: 10.1136/bmjopen-  
1303 2019-029207
- 1304 77. Drummond MF, Sculpher MJ, Claxton K, Stoddart GL, Torrance GW. *Methods for the Economic  
1305 Evaluation of Health Care Programmes*. Fourth Edition. Oxford University Press, London; 2015.
- 1306 78. Preferred reporting items for systematic review and meta-analysis protocols (PRISMA-P) 2015:  
1307 elaboration and explanation. *BMJ* [Internet]. 2016 Jul 21; i4086. doi: 10.1136/bmj.i4086
- 1308 79. Tacconelli E. Systematic reviews: CRD's guidance for undertaking reviews in health care. *The Lancet  
1309 Infectious Diseases* [Internet]. 2010 Apr; 10(4):226. doi: 10.1016/s1473-3099(10)70065-7
- 1310 80. Evers S, Goossens M, de Vet H, van Tulder M, Ament A. Criteria list for assessment of methodological  
1311 quality of economic evaluations: Consensus on Health Economic Criteria. *Int J Technol Assess Health Care*  
1312 [Internet]. 2005 Apr; 21(2):240–5. doi: 10.1017/s0266462305050324

- 1313 81. Landeiro F, Walsh K, Ghinai I, Mughal S, Nye E, Wace H, et al. Measuring quality of life of people  
1314 with predementia and dementia and their caregivers: a systematic review protocol. *BMJ Open* [Internet].  
1315 2018 Mar; 8(3):e019082. doi: 10.1136/bmjopen-2017-019082
- 1316 82. Larson EB, Kukull WA, Katzman RL. Cognitive Impairment: Dementia and Alzheimer's Disease.  
1317 *Annu Rev Public Health* [Internet]. 1992 May; 13(1):431–49. doi: 10.1146/annurev.pu.13.050192.002243
- 1318 83. Olde Rikkert MGM, Tona KD, Janssen L, Burns A, Lobo A, Robert P, et al. Validity, Reliability, and  
1319 Feasibility of Clinical Staging Scales in Dementia. *Am J Alzheimers Dis Other Demen* [Internet]. 2011 Aug;  
1320 26(5):357–65. doi: 10.1177/1533317511418954
- 1321 84. Cerejeira J, Lagarto L, Mukaetova-Ladinska EB. Behavioral and Psychological Symptoms of  
1322 Dementia. *Front Neur* [Internet]. 2012; 3. doi: 10.3389/fneur.2012.00073
- 1323 85. Bunn F, Burn A-M, Goodman C, Rait G, Norton S, Robinson L, et al. Comorbidity and dementia: a  
1324 scoping review of the literature. *BMC Med* [Internet]. 2014 Oct 31; 12(1). doi: 10.1186/s12916-014-0192-4
- 1325 86. Pivi GAK, Bertolucci PHF, Schultz RR. Nutrition in Severe Dementia. *Current Gerontology and*  
1326 *Geriatrics Research* [Internet]. 2012; 2012:1–7. doi: 10.1155/2012/983056
- 1327 87. Regan M. The interface between dementia and mental health: an evidence review. *Mental Health*  
1328 *Foundation*, London; 2016.
- 1329 88. Ijaopo EO. Dementia-related agitation: a review of non-pharmacological interventions and analysis of  
1330 risks and benefits of pharmacotherapy. *Transl Psychiatry* [Internet]. 2017 Oct; 7(10):e1250–e1250. doi:  
1331 10.1038/tp.2017.199
- 1332 89. Millán-Calenti JC, Tubío J, Pita-Fernández S, González-Abraldes I, Lorenzo T, Fernández-Arruty T,  
1333 et al. Prevalence of functional disability in activities of daily living (ADL), instrumental activities of daily  
1334 living (IADL) and associated factors, as predictors of morbidity and mortality. *Archives of Gerontology and*  
1335 *Geriatrics* [Internet]. 2010 May; 50(3):306–10. doi: 10.1016/j.archger.2009.04.017
- 1336 90. Bennett HQ, Norton S, Bunn F, Robinson L, Rait G, Goodman C, et al. The impact of dementia on  
1337 service use by individuals with a comorbid health condition: a comparison of two cross-sectional analyses  
1338 conducted approximately 10 years apart. *BMC Med* [Internet]. 2018 Jul 24; 16(1). doi: 10.1186/s12916-018-  
1339 1105-8



- 1340 91. Eska K, Graessel E, Donath C, Schwarzkopf L, Lauterberg J, Holle R. Predictors of Institutionalization  
1341 of Dementia Patients in Mild and Moderate Stages: A 4-Year Prospective Analysis. *Dement Geriatr Cogn*  
1342 *Disord Extra* [Internet]. 2013; 3(1):426–45. doi: 10.1159/000355079
- 1343 92. Belle SH. Enhancing the Quality of Life of Dementia Caregivers from Different Ethnic or Racial  
1344 Groups. *Ann Intern Med* [Internet]. 2006 Nov 21; 145(10):727. doi: 10.7326/0003-4819-145-10-200611210-  
1345 00005
- 1346 93. Zarit SH, Todd PA, Zarit JM. Subjective Burden of Husbands and Wives as Caregivers: A  
1347 Longitudinal Study. *The Gerontologist* [Internet]. 1986 Jun 1; 26(3):260–6. doi: 10.1093/geront/26.3.260
- 1348 94. Yu H, Wang X, He R, Liang R, Zhou L. Measuring the Caregiver Burden of Caring for Community-  
1349 Residing People with Alzheimer’s Disease. Ginsberg SD, editor. *PLoS ONE* [Internet]. 2015 Jul 8;  
1350 10(7):e0132168. doi: 10.1371/journal.pone.0132168
- 1351 95. Schepers AK, Orrell M, Shanahan N, Spector A. Sense of Competence in Dementia Care Staff  
1352 (SCIDS) scale: development, reliability, and validity. *Int Psychogeriatr* [Internet]. 2012 Feb 20; 24(7):1153–  
1353 62. doi: 10.1017/s104161021100247x
- 1354 96. Infurna FJ, Gerstorf D, Zarit SH. Substantial Changes in Mastery Perceptions of Dementia Caregivers  
1355 With the Placement of a Care Recipient. *The Journals of Gerontology Series B: Psychological Sciences and*  
1356 *Social Sciences* [Internet]. 2012 Sep 5; 68(2):202–14. doi: 10.1093/geronb/gbs063
- 1357 97. Thies W, Bleiler L. 2012 Alzheimer’s disease facts and figures Alzheimer’s Association \*.  
1358 *Alzheimer’s & Dementia* [Internet]. 2012 Mar; 8(2):131–68. doi: 10.1016/j.jalz.2012.02.001
- 1359 98. von Känel R, Mills PJ, Mausbach BT, Dimsdale JE, Patterson TL, Ziegler MG, et al. Effect of  
1360 Alzheimer Caregiving on Circulating Levels of C-Reactive Protein and Other Biomarkers Relevant to  
1361 Cardiovascular Disease Risk: A Longitudinal Study. *Gerontology* [Internet]. 2012; 58(4):354–65. doi:  
1362 10.1159/000334219
- 1363 99. Joling KJ, van Hout HPJ, Schellevis FG, van der Horst HE, Scheltens P, Knol DL, et al. Incidence of  
1364 Depression and Anxiety in the Spouses of Patients With Dementia: A Naturalistic Cohort Study of Recorded  
1365 Morbidity With a 6-Year Follow-Up. *The American Journal of Geriatric Psychiatry* [Internet]. 2010 Feb;  
1366 18(2):146–53. doi: 10.1097/jgp.0b013e3181bf9f0f

- 1367 100. Richardson TJ, Lee SJ, Berg-Weger M, Grossberg GT. Caregiver Health: Health of Caregivers of  
1368 Alzheimer's and Other Dementia Patients. *Curr Psychiatry Rep* [Internet]. 2013 May 28; 15(7). doi:  
1369 10.1007/s11920-013-0367-2
- 1370 101. Barker HR, Griffiths P, Mesa-Eguiagaray I, Pickering R, Gould L, Bridges J. Quantity and quality of  
1371 interaction between staff and older patients in UK hospital wards: A descriptive study. *International Journal*  
1372 *of Nursing Studies* [Internet]. 2016 Oct; 62:100–7. doi: 10.1016/j.ijnurstu.2016.07.018
- 1373 102. Lippa M, Riedel-Heller SG, Stein J, Leicht H, König H-H, van den Bussche H, et al. Predictors of  
1374 Institutionalisation in Incident Dementia – Results of the German Study on Ageing, Cognition and Dementia  
1375 in Primary Care Patients (AgeCoDe Study). *Dement Geriatr Cogn Disord* [Internet]. 2012; 33(4):282–8. doi:  
1376 10.1159/000339729
- 1377 103. Fauth E, Hess K, Piercy K, Norton M, Corcoran C, Rabins P, et al. Caregivers' relationship closeness  
1378 with the person with dementia predicts both positive and negative outcomes for caregivers' physical health  
1379 and psychological well-being. *Aging & Mental Health* [Internet]. 2012 Aug; 16(6):699–711. doi:  
1380 10.1080/13607863.2012.678482
- 1381 104. Snyder CM, Fauth E, Wanzek J, Piercy KW, Norton MC, Corcoran C, et al. Dementia caregivers'  
1382 coping strategies and their relationship to health and well-being: the Cache County Study. *Aging & Mental*  
1383 *Health* [Internet]. 2014 Aug 5; 19(5):390–9. doi: 10.1080/13607863.2014.939610
- 1384 105. Moore MJ, Zhu CW, Clipp EC. Informal Costs of Dementia Care: Estimates From the National  
1385 Longitudinal Caregiver Study. *The Journals of Gerontology Series B: Psychological Sciences and Social*  
1386 *Sciences* [Internet]. 2001 Jul 1; 56(4):S219–28. doi: 10.1093/geronb/56.4.s219
- 1387 106. Martindale-Adams J, Nichols LO, Zuber J, Burns R, Graney MJ. Dementia Caregivers' Use of  
1388 Services for Themselves. *GERONT* [Internet]. 2015 Sep 8; 56(6):1053–61. doi: 10.1093/geront/gnv121
- 1389 107. Goren A, Montgomery W, Kahle-Wroblewski K, Nakamura T, Ueda K. Impact of caring for persons  
1390 with Alzheimer's disease or dementia on caregivers' health outcomes: findings from a community based  
1391 survey in Japan. *BMC Geriatr* [Internet]. 2016 Jun 10; 16(1). doi: 10.1186/s12877-016-0298-y
- 1392 108. Graff MJL, Adang EMM, Vernooij-Dassen MJM, Dekker J, Jönsson L, Thijssen M, et al. Community  
1393 occupational therapy for older patients with dementia and their care givers: cost effectiveness study. *BMJ*  
1394 [Internet]. 2008 Jan 2; 336(7636):134–8. doi: 10.1136/bmj.39408.481898.be

- 1395 109. Melis RJF, Adang E, Teerenstra S, van Eijken MIJ, Wimo A, Achterberg T v., et al. Multidimensional  
1396 Geriatric Assessment: Back to the Future Cost-Effectiveness of a Multidisciplinary Intervention Model for  
1397 Community-Dwelling Frail Older People. *The Journals of Gerontology Series A: Biological Sciences and*  
1398 *Medical Sciences* [Internet]. 2008 Mar 1; 63(3):275–82. doi: 10.1093/gerona/63.3.275
- 1399 110. Clare L, Kudlicka A, Oyebode JR, Jones RW, Bayer A, Leroi I, et al. Goal-oriented cognitive  
1400 rehabilitation for early-stage Alzheimer’s and related dementias: the GREAT RCT. *Health Technol Assess*  
1401 [Internet]. 2019 Mar; 23(10):1–242. doi: 10.3310/hta23100
- 1402 111. D’Amico F, Rehill A, Knapp M, Aguirre E, Donovan H, Hoare Z, et al. Maintenance Cognitive  
1403 Stimulation Therapy: An Economic Evaluation Within a Randomized Controlled Trial. *Journal of the*  
1404 *American Medical Directors Association* [Internet]. 2015 Jan; 16(1):63–70. doi:  
1405 10.1016/j.jamda.2014.10.020
- 1406 112. Orgeta V, Leung P, Yates L, Kang S, Hoare Z, Henderson C, et al. Individual cognitive stimulation  
1407 therapy for dementia: a clinical effectiveness and cost-effectiveness pragmatic, multicentre, randomised  
1408 controlled trial. *Health Technol Assess* [Internet]. 2015 Aug; 19(64):1–108. doi: 10.3310/hta19640
- 1409 113. Woods R, Bruce E, Edwards R, Elvish R, Hoare Z, Hounscome B, et al. REMCARE: reminiscence  
1410 groups for people with dementia and their family caregivers – effectiveness and cost-effectiveness pragmatic  
1411 multicentre randomised trial. *Health Technol Assess* [Internet]. 2012 Dec; 16(48). doi: 10.3310/hta16480
- 1412 114. Khan I, Petrou S, Khan K, Mistry D, Lall R, et al. Does Structured Exercise Improve Cognitive  
1413 Impairment in People with Mild to Moderate Dementia? A Cost-Effectiveness Analysis from a Confirmatory  
1414 Randomised Controlled Trial: The Dementia and Physical Activity (DAPA) Trial. *PharmacoEconomics*  
1415 *Open* [Internet]. 2018 Sep 11; 3(2):215–27. doi: 10.1007/s41669-018-0097-9
- 1416 115. Rädke A, Michalowsky B, Thyrian JR, Eichler T, Xie F, Hoffmann W. Who Benefits Most from  
1417 Collaborative Dementia Care from a Patient and Payer Perspective? A Subgroup Cost-Effectiveness  
1418 Analysis. *JAD* [Internet]. 2020 Mar 24; 74(2):449–62. doi: 10.3233/JAD-190578
- 1419 116. Gitlin LN, Hodgson N, Jutkowitz E, Pizzi L. The Cost-Effectiveness of a Nonpharmacologic  
1420 Intervention for Individuals With Dementia and Family Caregivers: The Tailored Activity Program. *The*  
1421 *American Journal of Geriatric Psychiatry* [Internet]. 2010 Jun; 18(6):510–9. doi:  
1422 10.1097/jgp.0b013e3181c37d13

- 1423 117. Livingston G, Barber J, Rapaport P, Knapp M, Griffin M, King D, et al. Long-term clinical and cost-  
1424 effectiveness of psychological intervention for family carers of people with dementia: a single-blind,  
1425 randomised, controlled trial. *The Lancet Psychiatry* [Internet]. 2014 Dec; 1(7):539–48. doi: 10.1016/s2215-  
1426 0366(14)00073-x
- 1427 118. Livingston G, Manela M, O’Keeffe A, Rapaport P, Cooper C, Knapp M, et al. Clinical effectiveness  
1428 of the START (STrAtegies for RelaTives) psychological intervention for family carers and the effects on the  
1429 cost of care for people with dementia: 6-year follow-up of a randomised controlled trial. *Br J Psychiatry*  
1430 [Internet]. 2019 Jul 12; 216(1):35–42. doi: 10.1192/bjp.2019.160
- 1431 119. Sado M, Funaki K, Ninomiya A, Knapp M, Mimura M. Does the Combination of the Cognitive  
1432 Interventions Improve the Function of Daily Living and Save the Long-Term Care Cost? A Pilot Study of  
1433 Effectiveness and Cost Saving Analysis of “Learning Therapy” for People with Dementia. Palm R, editor.  
1434 *JAD* [Internet]. 2020 Apr 7; 74(3):775–84. doi: 10.3233/JAD-190886
- 1435 120. Mervin MC, Moyle W, Jones C, Murfield J, Draper B, Beattie E, et al. The Cost-Effectiveness of  
1436 Using PARO, a Therapeutic Robotic Seal, to Reduce Agitation and Medication Use in Dementia: Findings  
1437 from a Cluster–Randomized Controlled Trial. *Journal of the American Medical Directors Association*  
1438 [Internet]. 2018 Jul; 19(7):619-622.e1. doi: 10.1016/j.jamda.2017.10.008
- 1439 121. van de Ven G, Draskovic I, van Herpen E, Koopmans RTCM, Donders R, Zuidema SU, et al. The  
1440 Economics of Dementia-Care Mapping in Nursing Homes: A Cluster-Randomised Controlled Trial. Quinn  
1441 TJ, editor. *PLoS ONE* [Internet]. 2014 Jan 28; 9(1):e86662. doi: 10.1371/journal.pone.0086662
- 1442 122. Gaugler JE, Zarit SH, Townsend A, Parris Stephens M-A, Greene R. Evaluating Community-Based  
1443 Programs for Dementia Caregivers: The Cost Implications of Adult Day Services. *J Appl Gerontol* [Internet].  
1444 2003 Feb; 22(1):118–33. doi: 10.1177/0733464802250049
- 1445 123. Wilson E, Thalanany M, Shepstone L, Charlesworth G, Poland F, Harvey I, et al. Befriending carers  
1446 of people with dementia: a cost utility analysis. *Int J Geriatr Psychiatry* [Internet]. 2009 Jun; 24(6):610–23.  
1447 doi: 10.1002/gps.2164
- 1448 124. Knapp M, Thorgrimsen L, Patel A, Spector A, Hallam A, Woods B, et al. Cognitive stimulation  
1449 therapy for people with dementia: cost-effectiveness analysis. *Br J Psychiatry* [Internet]. 2006 Jun;  
1450 188(6):574–80. doi: 10.1192/bjp.bp.105.010561

- 1451 125. D'Amico F, Rehill A, Knapp M, Lowery D, Cerga-Pashoja A, Griffin M, et al. Cost-effectiveness of  
1452 exercise as a therapy for behavioural and psychological symptoms of dementia within the EVIDEM-E  
1453 randomised controlled trial. *Int J Geriatr Psychiatry* [Internet]. 2015 Oct 21; 31(6):656–65. doi:  
1454 10.1002/gps.4376
- 1455 126. Claxton K, Martin S, Soares M, Rice N, Spackman E, Hinde S, et al. Methods for the estimation of  
1456 the National Institute for Health and Care Excellence cost-effectiveness threshold. *Health Technology*  
1457 *Assessment* [Internet]. 2015 Feb; 19(14):1–504. doi: 10.3310/hta19140
- 1458 127. Charlesworth G, Shepstone L, Wilson E, Thalanany M, Mugford M, Poland F. Does befriending by  
1459 trained lay workers improve psychological well-being and quality of life for carers of people with dementia,  
1460 and at what cost? A randomised controlled trial. *Health Technol Assess* [Internet]. 2008 Mar; 12(4). doi:  
1461 10.3310/hta12040
- 1462 128. Arons AM, Krabbe PF, Schölzel-Dorenbos CJ, van der Wilt GJ, Rikkert MGO. Quality of life in  
1463 dementia: a study on proxy bias. *BMC Med Res Methodol* [Internet]. 2013 Sep 6; 13(1). doi: 10.1186/1471-  
1464 2288-13-110
- 1465 129. Kahle-Wroblewski K, Ye W, Henley D, Hake AM, Siemers E, Chen Y, et al. Assessing quality of life  
1466 in Alzheimer's disease: Implications for clinical trials. *Alzheimer's & Dementia: Diagnosis,*  
1467 *Assessment & Disease Monitoring* [Internet]. 2016 Dec 13; 6(1):82–90. doi:  
1468 10.1016/j.dadm.2016.11.004
- 1469 130. Hughes S, Shuman SB, Wiener JM, Gould E. Research on Supportive Approaches for Family and  
1470 Other Caregivers. Background Paper. Research Summit on Dementia Care. 2017 Mar.

Figure 1. PRISMA flow chart of the study selection process.

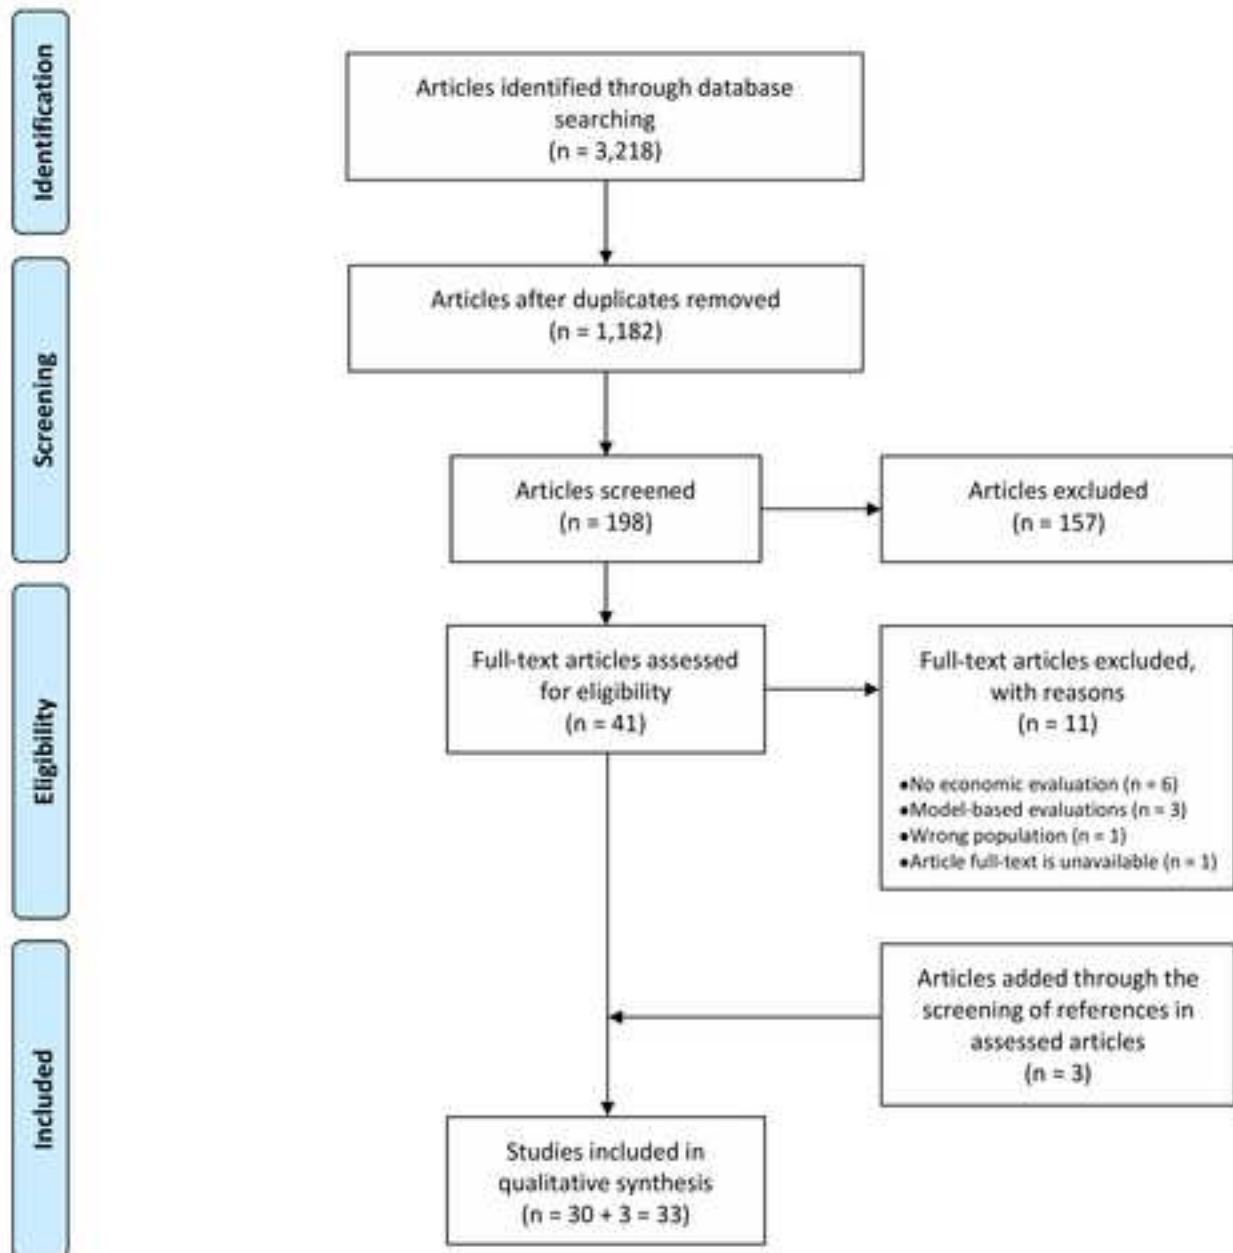

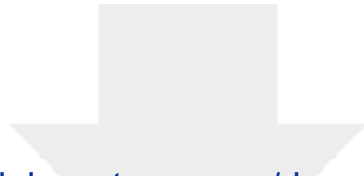

Click here to access/download  
**Supporting Information**  
PRISMA checklist S1.docx

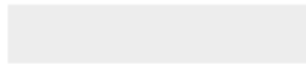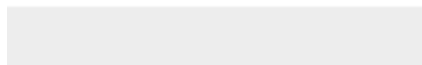

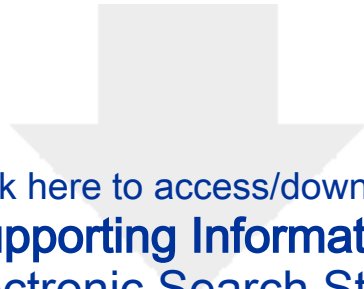

[Click here to access/download](#)

**Supporting Information**

S1 File\_Electronic Search Strategy.docx

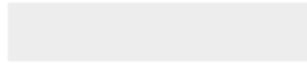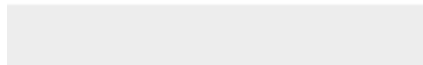





Click here to access/download  
**Supporting Information**  
S1 Table.docx





Click here to access/download  
**Supporting Information**  
S2 Table.docx



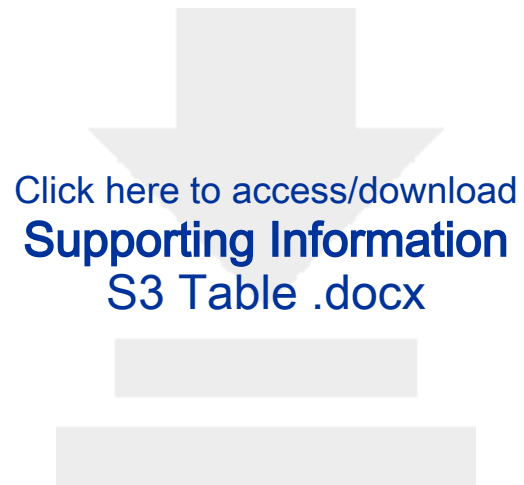

Click here to access/download  
**Supporting Information**  
S3 Table .docx
